# Supplementary material for: Characterisation of “caramel-type” thermal decomposition products of selected monosaccharides including fructose, mannose, galactose, arabinose and ribose by advanced electrospray ionization mass spectrometry methods
Source: Royal Society of Chemistry journal article supplement (doi:10.1039/c3fo30352g), 2013-01-01
Supplement: c3fo30352g.pdf [file c3fo30352g.pdf]

## Supporting information

# Characterisation of “caramel-type” thermal decomposition products of selected monosaccharides including fructose, mannose, galactose, arabinose and ribose by advanced electrospray ionization mass spectrometry methods

Agnieszka Golon and Nikolai Kuhnert\*

*School of Engineering and Science, Jacobs University Bremen,  
Campus Ring 1, 28759 Bremen, Germany*

To whom correspondence should be addressed. E-mail: [n.kuhnert@jacobs-university.de](mailto:n.kuhnert@jacobs-university.de)

### Table of Contents:

**Figure S1.** Mass spectra of caramelised: a) fructose, b) galactose, c) mannose in the positive ion mode using a direct infusion into an ESI-TOF-MS instrument

**Table S1** High resolution mass (MS-TOF) data of caramelised: a) fructose, b) galactose, c) ribose and d) arabinose and their parent ions (M-H) in the negative ion mode

**Figure S2** Two dimensional Kendrick plots for mass increment H<sub>2</sub>O showing the distribution of the Kendrick mass defect plotted against the nominal Kendrick mass of pseudo-molecular ions for caramelised: a) fructose, b) galactose, c) ribose and d) arabinose in the negative ion mode

**Figure S3** Thermogravimetric curves of caramelised: a) fructose, b) galactose and c) mannose

**Figure S4** Infrared spectra of caramelised: a) fructose b) galactose and c) mannose

**Figure S5**  $^1\text{H}$  NMR spectra of caramelized a) fructose, b) galactose and c) mannose

**Figure S6** EIC at  $m/z$  341.0 ( $\text{C}_{12}\text{H}_{22}\text{O}_{11}$ ) for caramelised fructose in the negative ion mode

**Figure S7** EIC at  $m/z$  341.0 ( $\text{C}_{12}\text{H}_{22}\text{O}_{11}$ ) for caramelised galactose in the negative ion mode

**Figure S8**  $\text{MS}^2$  spectra of fragment at  $m/z$  341.0 ( $\text{C}_{12}\text{H}_{22}\text{O}_{11}$ ) for five chromatographic peaks of caramelised fructose in the negative ion mode

**Figure S9**  $\text{MS}^2$  spectra of fragment at  $m/z$  503.0 ( $\text{C}_{18}\text{H}_{32}\text{O}_{16}$ ) for ten chromatographic peaks of caramelised fructose in the negative ion mode

**Figure S10**  $\text{MS}^2$  spectra of fragment at  $m/z$  647.0 ( $\text{C}_{24}\text{H}_{40}\text{O}_{20}$ ) for ten chromatographic peaks of caramelised fructose in the negative ion mode

**Figure S11**  $\text{MS}^2$  spectra of fragment at  $m/z$  809.0 ( $\text{C}_{30}\text{H}_{50}\text{O}_{25}$ ) for seven chromatographic peaks of caramelised fructose in the negative ion mode

**Figure S12**  $\text{MS}^2$  spectra of fragment at  $m/z$  341.0 ( $\text{C}_{12}\text{H}_{22}\text{O}_{11}$ ) for two chromatographic peaks of caramelised galactose in the negative ion mode

**Figure S13**  $\text{MS}^2$  spectra of fragment at  $m/z$  503.0 ( $\text{C}_{18}\text{H}_{32}\text{O}_{16}$ ) for four chromatographic peaks of caramelised galactose in the negative ion mode

**Figure S14**  $\text{MS}^2$  spectra of fragment at  $m/z$  503.0 ( $\text{C}_{18}\text{H}_{32}\text{O}_{16}$ ) for four chromatographic peaks of caramelised mannose in the negative ion mode

**Figure S15**  $\text{MS}^2$  spectra of fragment at  $m/z$  647.0 ( $\text{C}_{24}\text{H}_{40}\text{O}_{20}$ ) for ten chromatographic peaks of caramelised mannose in the negative ion mode

**Figure S16**  $\text{MS}^2$  spectra of fragment at  $m/z$  809.0 ( $\text{C}_{30}\text{H}_{50}\text{O}_{25}$ ) for seven chromatographic peaks of caramelised mannose in the negative ion mode

**Figure S17** EIC at  $m/z$  161.0 ( $\text{C}_6\text{H}_{10}\text{O}_5$ ) for caramelised fructose in the negative ion mode

**Figure S18** EIC at  $m/z$  323.0 ( $\text{C}_{12}\text{H}_{20}\text{O}_{10}$ ) for caramelised fructose in the negative ion mode

**Figure S19** EIC at  $m/z$  161.0 ( $\text{C}_6\text{H}_{10}\text{O}_5$ ) for caramelised galactose in the negative ion mode

**Figure S20** EIC at  $m/z$  323.0 ( $\text{C}_{12}\text{H}_{20}\text{O}_{10}$ ) for caramelised galactose in the negative ion mode

**Figure S21** EIC at  $m/z$  323.0 ( $\text{C}_{12}\text{H}_{20}\text{O}_{10}$ ) for caramelised mannose in the negative ion mode

**Figure S22** EIC at  $m/z$  359.0 ( $C_{12}H_{24}O_{12}$ ) for caramelised fructose in the negative ion mode

**Figure S23** EIC at  $m/z$  359.0 ( $C_{12}H_{24}O_{12}$ ) for caramelised galactose in the negative ion mode

**Figure S24** EIC at  $m/z$  149.0 ( $C_5H_{10}O_5$ ) for caramelised rybose in negative ion mode

**Figure S25**  $MS^2$  spectra of fragment at  $m/z$  149.0 ( $C_5H_{10}O_5$ ) for three chromatographic peaks of caramelised rybose in the negative ion mode

**Figure S26** EIC at  $m/z$  149.0 ( $C_5H_{10}O_5$ ) for caramelised arabinose in the negative ion mode

**Figure S27**  $MS^2$  spectra of fragment at  $m/z$  149 ( $C_5H_8O_4$ ) for three chromatographic peaks of caramelised arabinose in the negative ion mode

**Figure S28** EIC at  $m/z$  281.0 ( $C_{10}H_{18}O_9$ ) for caramelised rybose in the negative ion mode

**Figure S29**  $MS^2$  spectra of fragment at  $m/z$  281.0 ( $C_{10}H_{18}O_9$ ) for four chromatographic peaks of caramelised rybose in the negative ion mode

**Figure S30** EIC at  $m/z$  281.0 ( $C_{10}H_{18}O_9$ ) for caramelised arabinose in the negative ion mode

**Figure S31**  $MS^2$  spectra of fragment at  $m/z$  281.0 ( $C_{10}H_{18}O_9$ ) for ten chromatographic peaks of caramelised arabinose in the negative ion mode

**Figure S32** EIC at  $m/z$  413.0 ( $C_{15}H_{26}O_{13}$ ) for caramelised rybose in the negative ion mode

**Figure S33**  $MS^2$  spectra of fragment at  $m/z$  413.0 ( $C_{15}H_{26}O_{13}$ ) for three chromatographic peaks of caramelised rybose in the negative ion mode

**Figure S34** EIC at  $m/z$  413.0 ( $C_{15}H_{26}O_{13}$ ) for caramelised arabinose in the negative ion mode

**Figure S35**  $MS^2$  spectra of fragment at  $m/z$  413.0 ( $C_{15}H_{26}O_{13}$ ) for six chromatographic peaks of caramelised arabinose in the negative ion mode

**Figure S36** EIC at  $m/z$  113.0 ( $C_5H_6O_3$ ) for caramelised rybose in the negative ion mode

**Figure S37** EIC at  $m/z$  113.0 ( $C_5H_6O_3$ ) for caramelised arabinose in the negative ion mode

**Figure S38** EIC at  $m/z$  263.0 ( $C_{10}H_{16}O_8$ ) for caramelised rybose in the negative ion mode

**Figure S39**  $MS^2$  spectra of fragment at  $m/z$  263.0 ( $C_{10}H_{16}O_8$ ) for seven chromatographic peaks of caramelised rybose in the negative ion mode

**Figure S40** EIC at  $m/z$  263.0 ( $C_{10}H_{16}O_8$ ) for caramelised arabinose in the negative ion mode

**Figure S41** MS<sup>2</sup> spectra of fragment at  $m/z$  263 (C<sub>10</sub>H<sub>16</sub>O<sub>8</sub>) for three chromatographic peaks of caramelised arabinose in the negative ion mode

**Figure S42** EIC at  $m/z$  395.0 (C<sub>15</sub>H<sub>24</sub>O<sub>12</sub>) for caramelised arabinose in the negative ion mode

**Figure S43** MS<sup>2</sup> spectra of fragment at  $m/z$  395.0 (C<sub>15</sub>H<sub>24</sub>O<sub>12</sub>) for six chromatographic peaks of caramelised arabinose in the negative ion mode

**Figure S44** EIC at  $m/z$  527.0 (C<sub>20</sub>H<sub>32</sub>O<sub>16</sub>) for caramelised rybose in the negative ion mode

**Figure S45** MS<sup>2</sup> spectra of fragment at  $m/z$  527.0 (C<sub>20</sub>H<sub>32</sub>O<sub>16</sub>) for six chromatographic peaks of caramelised rybose in the negative ion mode

**Figure S46** EIC at  $m/z$  791.0 (C<sub>30</sub>H<sub>48</sub>O<sub>24</sub>) for caramelised rybose in the negative ion mode

**Figure S47** MS<sup>2</sup> spectra of fragment at  $m/z$  791.0 (C<sub>30</sub>H<sub>48</sub>O<sub>24</sub>) for six chromatographic peaks of caramelised rybose in the negative ion mode

**TableS2** Negative ion mode ESI-MS/MS data for caramelised fructose

**TableS3** Negative ion mode ESI-MS/MS data for caramelised galactose

**TableS4** Negative ion mode ESI-MS/MS data for caramelised mannose

a)

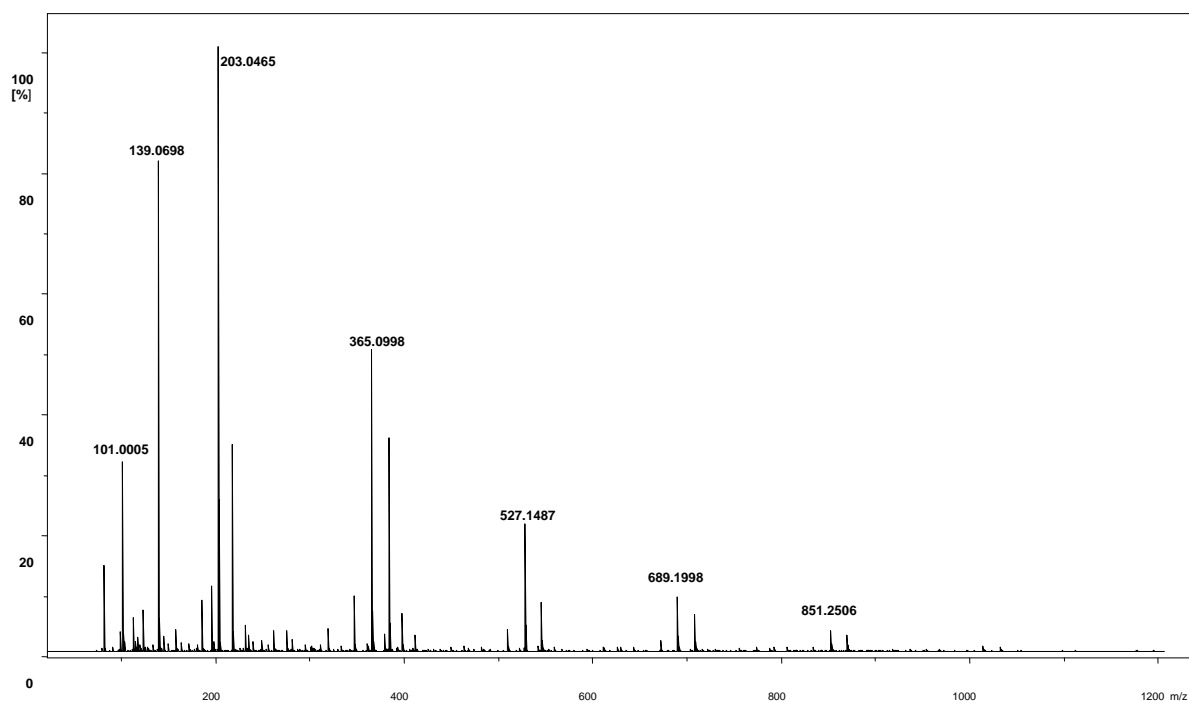

b)

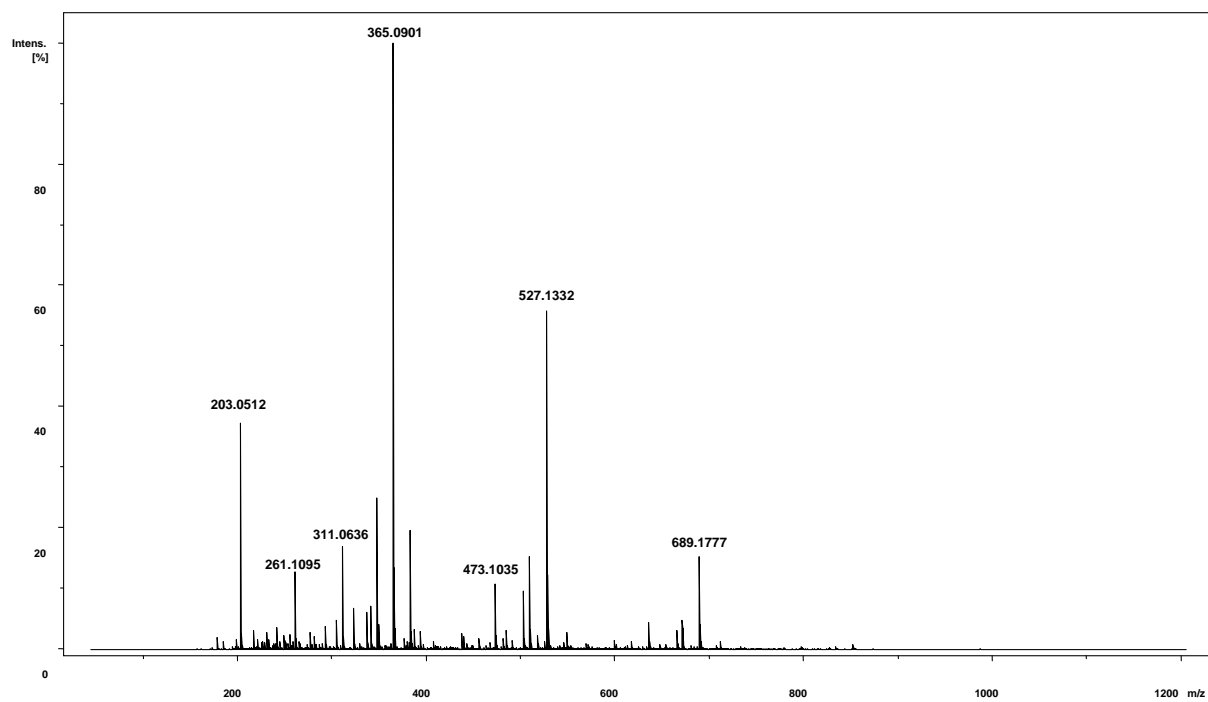

c)

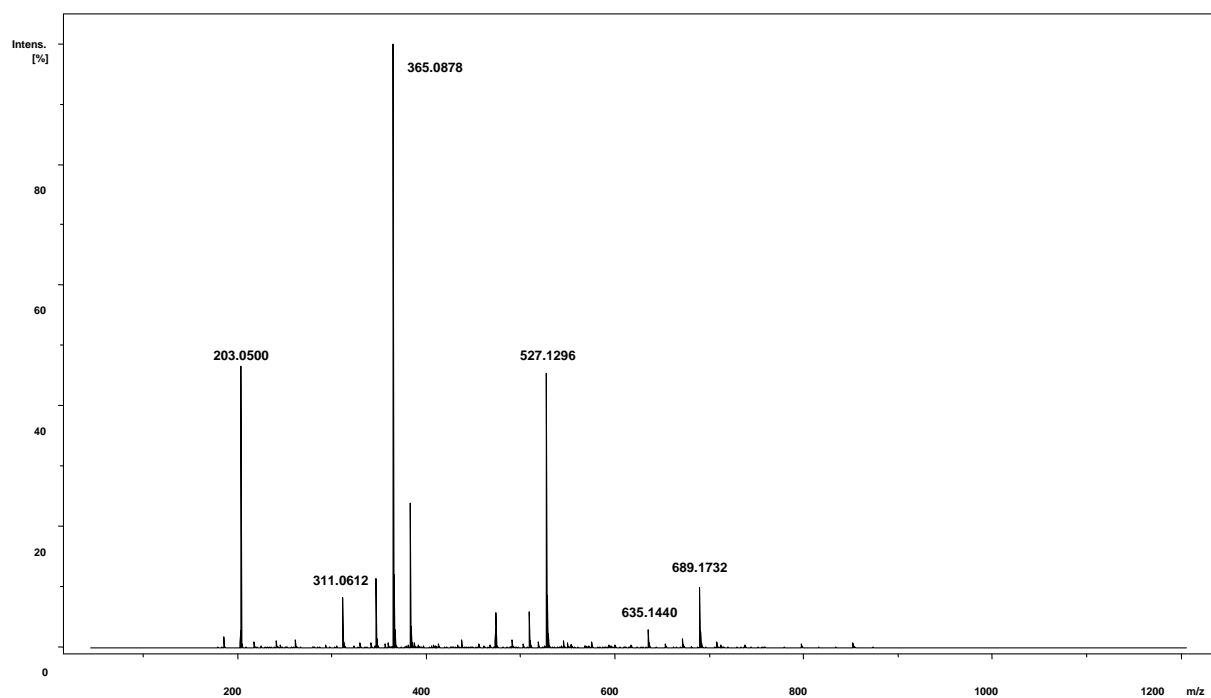

**Figure S1.** Mass spectra of caramelised: a) fructose, b) galactose and c) mannose in the positive ion mode using a direct infusion into an ESI-TOF-MS instrument

**Table S1** High resolution mass (MS-TOF) data of caramelised: a) fructose, b) galactose, c) ribose, d) arabinose and their parent ions (M-H) in the negative ion mode

a)

| Peak numbering | Assignment                              | Mol. Formula                                    | Experimental $m/z$ [M-H] | Theoretical $m/z$ [M-H] | Relative Error [ppm] |
|----------------|-----------------------------------------|-------------------------------------------------|--------------------------|-------------------------|----------------------|
| 1              |                                         | C <sub>9</sub> H <sub>18</sub> O <sub>2</sub>   | 157.1236                 | 157.1234                | 1.5                  |
| 2              | Fru - H <sub>2</sub> O                  | C <sub>6</sub> H <sub>10</sub> O <sub>5</sub>   | 161.0457                 | 161.0455                | 0.7                  |
| 3              | Fru                                     | C <sub>6</sub> H <sub>12</sub> O <sub>6</sub>   | 179.0561                 | 179.0561                | 0.0                  |
| 4              |                                         | C <sub>7</sub> H <sub>14</sub> O <sub>8</sub>   | 225.0608                 | 225.0616                | 3.7                  |
| 5              |                                         | C <sub>14</sub> H <sub>28</sub> O <sub>2</sub>  | 227.2018                 | 227.2017                | 0.7                  |
| 6              |                                         | C <sub>15</sub> H <sub>30</sub> O <sub>2</sub>  | 241.2181                 | 241.2173                | 3.3                  |
| 7              |                                         | C <sub>16</sub> H <sub>32</sub> O <sub>2</sub>  | 255.2341                 | 255.2330                | 4.6                  |
| 8              |                                         | C <sub>18</sub> H <sub>36</sub> O <sub>2</sub>  | 283.2653                 | 283.2643                | 3.8                  |
| 9              |                                         | C <sub>12</sub> H <sub>16</sub> O <sub>8</sub>  | 287.0765                 | 287.0772                | 2.8                  |
| 10             |                                         | C <sub>17</sub> H <sub>26</sub> O <sub>4</sub>  | 293.1760                 | 293.1758                | 0.7                  |
| 11             | (Fru) <sub>2</sub> - 2×H <sub>2</sub> O | C <sub>12</sub> H <sub>18</sub> O <sub>9</sub>  | 305.0891                 | 305.0878                | 4.3                  |
| 12             | (Fru) <sub>2</sub> - H <sub>2</sub> O   | C <sub>12</sub> H <sub>20</sub> O <sub>10</sub> | 323.0977                 | 323.0984                | 2.0                  |
| 13             | (Fru) <sub>2</sub>                      | C <sub>12</sub> H <sub>22</sub> O <sub>11</sub> | 341.1083                 | 341.1089                | 1.9                  |
| 14             | (Fru) <sub>2</sub> + H <sub>2</sub> O   | C <sub>12</sub> H <sub>24</sub> O <sub>12</sub> | 359.1189                 | 359.1195                | 1.7                  |
| 15             |                                         | C <sub>13</sub> H <sub>24</sub> O <sub>13</sub> | 387.1150                 | 387.1144                | 1.5                  |
| 16             |                                         | C <sub>22</sub> H <sub>44</sub> O <sub>8</sub>  | 435.2970                 | 435.2963                | 1.5                  |
| 17             | (Fru) <sub>3</sub> - 3×H <sub>2</sub> O | C <sub>18</sub> H <sub>26</sub> O <sub>13</sub> | 449.1305                 | 449.1301                | 0.9                  |
| 18             | (Fru) <sub>3</sub> - 2×H <sub>2</sub> O | C <sub>18</sub> H <sub>28</sub> O <sub>14</sub> | 467.1408                 | 467.1406                | 0.4                  |
| 19             | (Fru) <sub>3</sub> - H <sub>2</sub> O   | C <sub>18</sub> H <sub>30</sub> O <sub>15</sub> | 485.1518                 | 485.1512                | 1.3                  |

|           |                                         |                                                 |          |          |     |
|-----------|-----------------------------------------|-------------------------------------------------|----------|----------|-----|
| <b>20</b> | (Fru) <sub>3</sub>                      | C <sub>18</sub> H <sub>32</sub> O <sub>16</sub> | 503.1628 | 503.1618 | 2.0 |
| <b>21</b> | (Fru) <sub>3</sub> + H <sub>2</sub> O   | C <sub>18</sub> H <sub>34</sub> O <sub>17</sub> | 521.1710 | 521.1723 | 2.5 |
| <b>22</b> | (Fru) <sub>4</sub> - 3×H <sub>2</sub> O | C <sub>24</sub> H <sub>36</sub> O <sub>18</sub> | 611.1846 | 611.1829 | 2.9 |
| <b>23</b> | (Fru) <sub>4</sub> - 2×H <sub>2</sub> O | C <sub>24</sub> H <sub>38</sub> O <sub>19</sub> | 629.1920 | 629.1935 | 1.4 |
| <b>24</b> | (Fru) <sub>4</sub> - H <sub>2</sub> O   | C <sub>24</sub> H <sub>40</sub> O <sub>20</sub> | 647.2027 | 647.2040 | 2.0 |
| <b>25</b> | (Fru) <sub>4</sub>                      | C <sub>24</sub> H <sub>42</sub> O <sub>21</sub> | 665.2134 | 665.2146 | 1.8 |
| <b>26</b> | (Fru) <sub>4</sub> + H <sub>2</sub> O   | C <sub>24</sub> H <sub>44</sub> O <sub>22</sub> | 683.2268 | 683.2251 | 2.4 |
| <b>27</b> | (Fru) <sub>5</sub> - 3×H <sub>2</sub> O | C <sub>30</sub> H <sub>46</sub> O <sub>23</sub> | 773.2334 | 773.2357 | 2.9 |
| <b>28</b> | (Fru) <sub>5</sub> - 2×H <sub>2</sub> O | C <sub>30</sub> H <sub>48</sub> O <sub>24</sub> | 791.2431 | 791.2463 | 4.0 |
| <b>29</b> | (Fru) <sub>5</sub> - H <sub>2</sub> O   | C <sub>30</sub> H <sub>50</sub> O <sub>25</sub> | 809.2545 | 809.2568 | 2.9 |
| <b>30</b> | (Fru) <sub>5</sub>                      | C <sub>30</sub> H <sub>52</sub> O <sub>26</sub> | 827.2701 | 827.2674 | 3.2 |
| <b>31</b> | (Fru) <sub>5</sub> + H <sub>2</sub> O   | C <sub>30</sub> H <sub>54</sub> O <sub>27</sub> | 845.2815 | 845.2780 | 4.2 |
| <b>32</b> | (Fru) <sub>6</sub> - H <sub>2</sub> O   | C <sub>36</sub> H <sub>60</sub> O <sub>30</sub> | 971.3119 | 971.3097 | 2.3 |
| <b>33</b> | (Fru) <sub>6</sub>                      | C <sub>36</sub> H <sub>62</sub> O <sub>31</sub> | 989.3173 | 989.3202 | 2.9 |



b)

| Peak numbering | Assignment                              | Mol. Formula                                    | Experimental $m/z$ [M-H] | Theoretical $m/z$ [M-H] | Relative Error [ppm] |
|----------------|-----------------------------------------|-------------------------------------------------|--------------------------|-------------------------|----------------------|
| 1              |                                         | C <sub>6</sub> H <sub>12</sub> O <sub>2</sub>   | 115.0767                 | 115.0765                | 2.1                  |
| 2              |                                         | C <sub>7</sub> H <sub>6</sub> O <sub>2</sub>    | 121.0294                 | 121.0295                | 0.7                  |
| 3              |                                         | C <sub>4</sub> H <sub>8</sub> O <sub>4</sub>    | 119.0349                 | 119.0350                | 0.7                  |
| 4              |                                         | C <sub>7</sub> H <sub>14</sub> O <sub>2</sub>   | 129.0925                 | 129.0921                | 3.0                  |
| 5              |                                         | C <sub>8</sub> H <sub>16</sub> O <sub>2</sub>   | 143.1084                 | 143.1078                | 4.9                  |
| 6              |                                         | C <sub>9</sub> H <sub>18</sub> O <sub>2</sub>   | 157.1236                 | 157.1234                | 1.0                  |
| 7              | Gal - H <sub>2</sub> O                  | C <sub>6</sub> H <sub>10</sub> O <sub>5</sub>   | 161.0461                 | 161.0455                | 3.7                  |
| 8              | Galactose                               | C <sub>6</sub> H <sub>12</sub> O <sub>6</sub>   | 179.0564                 | 179.0561                | 1.4                  |
| 9              |                                         | C <sub>7</sub> H <sub>14</sub> O <sub>8</sub>   | 225.0608                 | 225.0616                | 3.6                  |
| 10             |                                         | C <sub>16</sub> H <sub>32</sub> O <sub>2</sub>  | 255.2324                 | 255.2330                | 2.0                  |
| 11             |                                         | C <sub>15</sub> H <sub>22</sub> O <sub>4</sub>  | 265.1452                 | 265.1445                | 2.5                  |
| 12             |                                         | C <sub>9</sub> H <sub>18</sub> O <sub>9</sub>   | 269.0869                 | 269.0878                | 3.5                  |
| 13             |                                         | C <sub>18</sub> H <sub>36</sub> O <sub>2</sub>  | 283.2629                 | 283.2643                | 4.6                  |
| 14             | (Gal) <sub>2</sub> - 3×H <sub>2</sub> O | C <sub>12</sub> H <sub>16</sub> O <sub>8</sub>  | 287.0769                 | 287.0772                | 1.2                  |
| 15             |                                         | C <sub>17</sub> H <sub>26</sub> O <sub>4</sub>  | 293.1758                 | 293.1758                | 0.1                  |
| 16             | (Gal) <sub>2</sub> - 2×H <sub>2</sub> O | C <sub>12</sub> H <sub>18</sub> O <sub>9</sub>  | 305.0863                 | 305.0878                | 4.9                  |
| 17             | (Gal) <sub>2</sub> - H <sub>2</sub> O   | C <sub>12</sub> H <sub>20</sub> O <sub>10</sub> | 323.0985                 | 323.0984                | 0.3                  |
| 18             | (Gal) <sub>2</sub>                      | C <sub>12</sub> H <sub>22</sub> O <sub>11</sub> | 341.1094                 | 341.1089                | 1.3                  |
| 19             | (Gal) <sub>2</sub> + H <sub>2</sub> O   | C <sub>12</sub> H <sub>24</sub> O <sub>12</sub> | 359.1183                 | 359.1195                | 3.2                  |
| 20             | (Gal) <sub>3</sub> - 4×H <sub>2</sub> O | C <sub>18</sub> H <sub>24</sub> O <sub>12</sub> | 431.1211                 | 431.1195                | 3.8                  |
| 21             | (Gal) <sub>3</sub> - 3×H <sub>2</sub> O | C <sub>18</sub> H <sub>26</sub> O <sub>13</sub> | 449.1281                 | 449.1301                | 4.4                  |
| 22             | (Gal) <sub>3</sub> - 2×H <sub>2</sub> O | C <sub>18</sub> H <sub>28</sub> O <sub>14</sub> | 467.1401                 | 467.1406                | 1.2                  |

|           |                                         |                                                 |           |           |     |
|-----------|-----------------------------------------|-------------------------------------------------|-----------|-----------|-----|
| <b>23</b> | (Gal) <sub>3</sub> - H <sub>2</sub> O   | C <sub>18</sub> H <sub>30</sub> O <sub>15</sub> | 485.1500  | 485.1512  | 2.4 |
| <b>24</b> | (Gal) <sub>3</sub>                      | C <sub>18</sub> H <sub>32</sub> O <sub>16</sub> | 503.1606  | 503.1618  | 2.3 |
| <b>25</b> | (Gal) <sub>3</sub> + H <sub>2</sub> O   | C <sub>18</sub> H <sub>34</sub> O <sub>17</sub> | 521.1729  | 521.1723  | 1.1 |
| <b>26</b> | (Gal) <sub>4</sub> - 3×H <sub>2</sub> O | C <sub>24</sub> H <sub>36</sub> O <sub>18</sub> | 611.1805  | 611.1829  | 3.9 |
| <b>27</b> | (Gal) <sub>4</sub> - 2×H <sub>2</sub> O | C <sub>24</sub> H <sub>38</sub> O <sub>19</sub> | 629.1907  | 629.1935  | 4.4 |
| <b>28</b> | (Gal) <sub>4</sub> - H <sub>2</sub> O   | C <sub>24</sub> H <sub>40</sub> O <sub>20</sub> | 647.2021  | 647.2040  | 3.0 |
| <b>29</b> | (Gal) <sub>4</sub>                      | C <sub>24</sub> H <sub>42</sub> O <sub>21</sub> | 665.2135  | 665.2146  | 1.6 |
| <b>30</b> | (Gal) <sub>4</sub> + H <sub>2</sub> O   | C <sub>24</sub> H <sub>44</sub> O <sub>22</sub> | 683.2222  | 683.2251  | 4.3 |
| <b>31</b> | (Gal) <sub>5</sub> - 5×H <sub>2</sub> O | C <sub>30</sub> H <sub>42</sub> O <sub>21</sub> | 737.2156  | 737.2146  | 1.4 |
| <b>32</b> | (Gal) <sub>5</sub> - 4×H <sub>2</sub> O | C <sub>30</sub> H <sub>44</sub> O <sub>22</sub> | 755.2227  | 755.2251  | 3.2 |
| <b>33</b> | (Gal) <sub>5</sub> - 3×H <sub>2</sub> O | C <sub>30</sub> H <sub>46</sub> O <sub>23</sub> | 773.2324  | 773.2357  | 4.2 |
| <b>34</b> | (Gal) <sub>5</sub> - 2×H <sub>2</sub> O | C <sub>30</sub> H <sub>48</sub> O <sub>24</sub> | 791.2425  | 791.2463  | 4.7 |
| <b>35</b> | (Gal) <sub>5</sub> - H <sub>2</sub> O   | C <sub>30</sub> H <sub>50</sub> O <sub>25</sub> | 809.2538  | 809.2568  | 3.4 |
| <b>36</b> | (Gal) <sub>5</sub>                      | C <sub>30</sub> H <sub>52</sub> O <sub>26</sub> | 827.2671  | 827.2674  | 0.3 |
| <b>37</b> | (Gal) <sub>5</sub> + H <sub>2</sub> O   | C <sub>30</sub> H <sub>54</sub> O <sub>27</sub> | 845.2752  | 845.2780  | 3.0 |
| <b>38</b> | (Gal) <sub>6</sub> - 3×H <sub>2</sub> O | C <sub>36</sub> H <sub>56</sub> O <sub>28</sub> | 935.2877  | 935.2885  | 0.9 |
| <b>39</b> | (Gal) <sub>6</sub> - 2×H <sub>2</sub> O | C <sub>36</sub> H <sub>58</sub> O <sub>29</sub> | 953.3013  | 953.2991  | 2.3 |
| <b>40</b> | (Gal) <sub>6</sub> - H <sub>2</sub> O   | C <sub>36</sub> H <sub>60</sub> O <sub>30</sub> | 971.3096  | 971.3097  | 0.0 |
| <b>41</b> | (Gal) <sub>6</sub>                      | C <sub>36</sub> H <sub>62</sub> O <sub>31</sub> | 989.3187  | 989.3202  | 1.5 |
| <b>42</b> | (Gal) <sub>6</sub> + H <sub>2</sub> O   | C <sub>36</sub> H <sub>64</sub> O <sub>32</sub> | 1007.3352 | 1007.3308 | 4.3 |

c)

| Peak numbering | Assignment                              | Mol. Formula                                    | Theoretical $m/z$ [M-H] <sup>-</sup> | Experimental $m/z$ [M-H] <sup>-</sup> | Relative Error [ppm] |
|----------------|-----------------------------------------|-------------------------------------------------|--------------------------------------|---------------------------------------|----------------------|
| 1              | Rib - 2×H <sub>2</sub> O                | C <sub>5</sub> H <sub>6</sub> O <sub>3</sub>    | 113.0244                             | 113.0246                              | 1.7                  |
| 2              | Rib - H <sub>2</sub> O                  | C <sub>5</sub> H <sub>8</sub> O <sub>4</sub>    | 131.0350                             | 131.0344                              | 4.4                  |
| 3              | Ribose                                  | C <sub>5</sub> H <sub>10</sub> O <sub>5</sub>   | 149.0455                             | 149.0456                              | 0.5                  |
| 4              | Rib + HCOOH                             | C <sub>6</sub> H <sub>12</sub> O <sub>7</sub>   | 195.0510                             | 195.0516                              | 3.0                  |
| 6              | (Rib) <sub>2</sub> - 3×H <sub>2</sub> O | C <sub>10</sub> H <sub>12</sub> O <sub>6</sub>  | 227.0561                             | 227.0572                              | 4.7                  |
| 7              | (Rib) <sub>2</sub> - 2×H <sub>2</sub> O | C <sub>10</sub> H <sub>14</sub> O <sub>7</sub>  | 245.0667                             | 245.0666                              | 0.5                  |
| 8              | (Rib) <sub>2</sub> - H <sub>2</sub> O   | C <sub>10</sub> H <sub>16</sub> O <sub>8</sub>  | 263.0772                             | 267.0779                              | 2.4                  |
| 9              | (Rib) <sub>2</sub>                      | C <sub>10</sub> H <sub>18</sub> O <sub>9</sub>  | 281.0878                             | 281.0864                              | 5.0                  |
| 10             |                                         | C <sub>11</sub> H <sub>16</sub> O <sub>9</sub>  | 291.0722                             | 291.0714                              | 2.4                  |
| 11             | (Rib) <sub>2</sub> + HCOOH              | C <sub>11</sub> H <sub>20</sub> O <sub>11</sub> | 327.0933                             | 327.0923                              | 2.9                  |
| 12             | (Rib) <sub>3</sub> - 3×H <sub>2</sub> O | C <sub>15</sub> H <sub>20</sub> O <sub>10</sub> | 359.0984                             | 359.0994                              | 3.0                  |
| 13             | (Rib) <sub>3</sub> - 2×H <sub>2</sub> O | C <sub>15</sub> H <sub>22</sub> O <sub>11</sub> | 377.1089                             | 377.1090                              | 0.1                  |
| 14             | (Rib) <sub>3</sub> - H <sub>2</sub> O   | C <sub>15</sub> H <sub>24</sub> O <sub>12</sub> | 395.1195                             | 395.1199                              | 1.0                  |
| 15             | (Rib) <sub>3</sub>                      | C <sub>15</sub> H <sub>26</sub> O <sub>13</sub> | 413.1301                             | 413.1293                              | 1.8                  |
| 16             | (Rib) <sub>3</sub> + HCOOH              | C <sub>16</sub> H <sub>28</sub> O <sub>15</sub> | 459.1355                             | 459.1355                              | 0.1                  |
| 17             | (Rib) <sub>4</sub> - 3×H <sub>2</sub> O | C <sub>20</sub> H <sub>28</sub> O <sub>14</sub> | 491.1406                             | 491.1378                              | 2.8                  |
| 18             | (Ryb) <sub>4</sub> - 2×H <sub>2</sub> O | C <sub>20</sub> H <sub>30</sub> O <sub>15</sub> | 509.1512                             | 509.1487                              | 4.9                  |
| 19             | (Ryb) <sub>4</sub> - H <sub>2</sub> O   | C <sub>20</sub> H <sub>32</sub> O <sub>16</sub> | 527.1618                             | 527.1609                              | 1.7                  |
| 20             | (Ryb) <sub>4</sub>                      | C <sub>20</sub> H <sub>34</sub> O <sub>17</sub> | 545.1723                             | 545.1739                              | 2.8                  |
| 21             | (Ryb) <sub>4</sub> + H <sub>2</sub> O   | C <sub>20</sub> H <sub>36</sub> O <sub>18</sub> | 563.1829                             | 563.1829                              | 0.0                  |
| 22             | (Ryb) <sub>4</sub> + HCOOH              | C <sub>21</sub> H <sub>36</sub> O <sub>19</sub> | 591.1778                             | 591.1793                              | 2.5                  |
| 23             | (Rib) <sub>5</sub> - 3×H <sub>2</sub> O | C <sub>25</sub> H <sub>36</sub> O <sub>18</sub> | 623.1829                             | 623.1751                              | 7.8                  |

|           |                                         |                                                 |          |          |     |
|-----------|-----------------------------------------|-------------------------------------------------|----------|----------|-----|
| <b>24</b> | (Rib) <sub>5</sub> - 2×H <sub>2</sub> O | C <sub>25</sub> H <sub>38</sub> O <sub>19</sub> | 641.1935 | 641.1904 | 4.7 |
| <b>25</b> | (Rib) <sub>5</sub> - H <sub>2</sub> O   | C <sub>25</sub> H <sub>40</sub> O <sub>20</sub> | 659.2040 | 659.2033 | 1.1 |
| <b>26</b> | (Rib) <sub>5</sub>                      | C <sub>25</sub> H <sub>42</sub> O <sub>21</sub> | 677.2146 | 677.2162 | 2.3 |
| <b>27</b> | (Rib) <sub>5</sub> + H <sub>2</sub> O   | C <sub>25</sub> H <sub>44</sub> O <sub>22</sub> | 695.2251 | 695.2266 | 2.1 |
| <b>28</b> | (Rib) <sub>5</sub> + HCOOH              | C <sub>26</sub> H <sub>44</sub> O <sub>23</sub> | 723.2201 | 723.2236 | 4.9 |
| <b>30</b> | (Rib) <sub>6</sub> - 3×H <sub>2</sub> O | C <sub>30</sub> H <sub>44</sub> O <sub>22</sub> | 755.2252 | 755.2272 | 2.0 |
| <b>31</b> | (Rib) <sub>6</sub> - 2×H <sub>2</sub> O | C <sub>30</sub> H <sub>46</sub> O <sub>23</sub> | 773.2357 | 773.2327 | 3.1 |
| <b>32</b> | (Rib) <sub>6</sub> - H <sub>2</sub> O   | C <sub>30</sub> H <sub>48</sub> O <sub>24</sub> | 791.2463 | 791.2450 | 1.6 |
| <b>33</b> | (Rib) <sub>6</sub>                      | C <sub>30</sub> H <sub>50</sub> O <sub>25</sub> | 809.2568 | 809.2604 | 4.4 |
| <b>34</b> | (Rib) <sub>6</sub> + H <sub>2</sub> O   | C <sub>30</sub> H <sub>52</sub> O <sub>26</sub> | 827.2674 | 827.2709 | 4.2 |

d)

| <b>Peak numbering</b> | <b>Assignment</b>                       | <b>Mol. Formula</b>                             | <b>Experimental <i>m/z</i> [M-H]<sup>-</sup></b> | <b>Theoretical <i>m/z</i> [M-H]<sup>-</sup></b> | <b>Relative Error [ppm]</b> |
|-----------------------|-----------------------------------------|-------------------------------------------------|--------------------------------------------------|-------------------------------------------------|-----------------------------|
| <b>1</b>              | Ara - H <sub>2</sub> O                  | C <sub>5</sub> H <sub>8</sub> O <sub>4</sub>    | 131.0350                                         | 131.0350                                        | 0.1                         |
| <b>2</b>              | Arabinose                               | C <sub>5</sub> H <sub>10</sub> O <sub>5</sub>   | 149.0454                                         | 149.0455                                        | 1.0                         |
| <b>3</b>              | (Ara) <sub>2</sub> - 3×H <sub>2</sub> O | C <sub>10</sub> H <sub>12</sub> O <sub>6</sub>  | 227.0550                                         | 227.0561                                        | 5.0                         |
| <b>4</b>              | (Ara) <sub>2</sub> - 2×H <sub>2</sub> O | C <sub>10</sub> H <sub>14</sub> O <sub>7</sub>  | 245.0673                                         | 245.0667                                        | 2.5                         |
| <b>5</b>              | (Ara) <sub>2</sub> - H <sub>2</sub> O   | C <sub>10</sub> H <sub>16</sub> O <sub>8</sub>  | 263.0761                                         | 263.0772                                        | 1.8                         |
| <b>6</b>              | (Ara) <sub>2</sub>                      | C <sub>10</sub> H <sub>18</sub> O <sub>9</sub>  | 281.0867                                         | 281.0878                                        | 2.0                         |
| <b>7</b>              | (Ara) <sub>2</sub> + H <sub>2</sub> O   | C <sub>10</sub> H <sub>20</sub> O <sub>10</sub> | 299.0972                                         | 299.0984                                        | 7.6                         |

|           |                                         |                                                 |          |          |     |
|-----------|-----------------------------------------|-------------------------------------------------|----------|----------|-----|
| <b>8</b>  | (Ara) <sub>2</sub> + HCOOH              | C <sub>11</sub> H <sub>20</sub> O <sub>11</sub> | 327.0922 | 327.0933 | 2.3 |
| <b>9</b>  | (Ara) <sub>3</sub> - 2×H <sub>2</sub> O | C <sub>15</sub> H <sub>22</sub> O <sub>11</sub> | 377.1078 | 377.1089 | 4.0 |
| <b>10</b> | (Ara) <sub>3</sub> - H <sub>2</sub> O   | C <sub>15</sub> H <sub>24</sub> O <sub>12</sub> | 395.1184 | 395.1195 | 0.3 |
| <b>11</b> | (Ara) <sub>3</sub>                      | C <sub>15</sub> H <sub>26</sub> O <sub>13</sub> | 413.1290 | 413.1301 | 2.2 |
| <b>12</b> | (Ara) <sub>3</sub> + H <sub>2</sub> O   | C <sub>15</sub> H <sub>28</sub> O <sub>14</sub> | 431.1395 | 431.1406 | 1.4 |
| <b>13</b> | (Ara) <sub>3</sub> + HCOOH              | C <sub>16</sub> H <sub>28</sub> O <sub>15</sub> | 459.1344 | 459.1355 | 2.8 |
| <b>14</b> | (Ara) <sub>4</sub> - 2×H <sub>2</sub> O | C <sub>20</sub> H <sub>30</sub> O <sub>15</sub> | 509.1501 | 509.1512 | 4.3 |
| <b>15</b> | (Ara) <sub>4</sub> - H <sub>2</sub> O   | C <sub>20</sub> H <sub>32</sub> O <sub>16</sub> | 527.1607 | 527.1618 | 1.7 |
| <b>16</b> | (Ara) <sub>4</sub>                      | C <sub>20</sub> H <sub>34</sub> O <sub>17</sub> | 545.1712 | 545.1723 | 1.0 |
| <b>17</b> | (Ara) <sub>4</sub> + H <sub>2</sub> O   | C <sub>20</sub> H <sub>36</sub> O <sub>18</sub> | 563.1818 | 563.1829 | 0.0 |
| <b>18</b> | (Ara) <sub>4</sub> + HCOOH              | C <sub>21</sub> H <sub>36</sub> O <sub>19</sub> | 591.1767 | 591.1778 | 0.4 |
| <b>19</b> | (Ara) <sub>5</sub> - 2×H <sub>2</sub> O | C <sub>25</sub> H <sub>38</sub> O <sub>19</sub> | 641.1924 | 641.1935 | 0.3 |
| <b>20</b> | (Ara) <sub>5</sub> - H <sub>2</sub> O   | C <sub>25</sub> H <sub>40</sub> O <sub>20</sub> | 659.2029 | 659.2040 | 0.8 |
| <b>21</b> | (Ara) <sub>5</sub>                      | C <sub>25</sub> H <sub>42</sub> O <sub>21</sub> | 677.2135 | 677.2146 | 0.5 |
| <b>22</b> | (Ara) <sub>5</sub> + H <sub>2</sub> O   | C <sub>25</sub> H <sub>44</sub> O <sub>22</sub> | 695.2241 | 695.2251 | 0.6 |
| <b>23</b> | (Ara) <sub>5</sub> + HCOOH              | C <sub>26</sub> H <sub>44</sub> O <sub>23</sub> | 723.2190 | 723.2201 | 1.9 |
| <b>24</b> | (Ara) <sub>6</sub> - 2×H <sub>2</sub> O | C <sub>30</sub> H <sub>46</sub> O <sub>23</sub> | 773.2346 | 773.2357 | 1.2 |
| <b>25</b> | (Ara) <sub>6</sub> - H <sub>2</sub> O   | C <sub>30</sub> H <sub>48</sub> O <sub>24</sub> | 791.2452 | 791.2463 | 4.0 |
| <b>26</b> | (Ara) <sub>6</sub>                      | C <sub>30</sub> H <sub>50</sub> O <sub>25</sub> | 809.2557 | 809.2568 | 2.2 |
| <b>27</b> | (Ara) <sub>6</sub> + H <sub>2</sub> O   | C <sub>30</sub> H <sub>52</sub> O <sub>26</sub> | 827.2663 | 827.2674 | 2.1 |
| <b>28</b> | (Ara) <sub>6</sub> + HCOOH              | C <sub>31</sub> H <sub>52</sub> O <sub>27</sub> | 855.2612 | 855.2623 | 0.9 |

a)

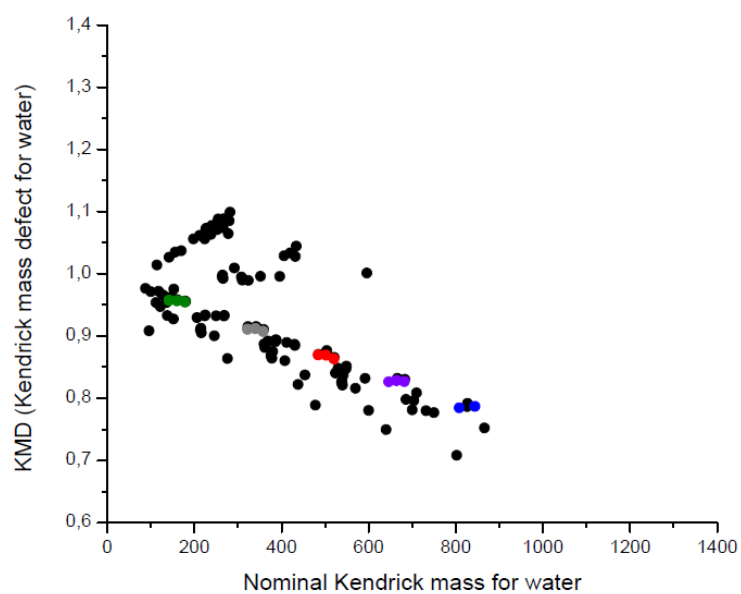

b)

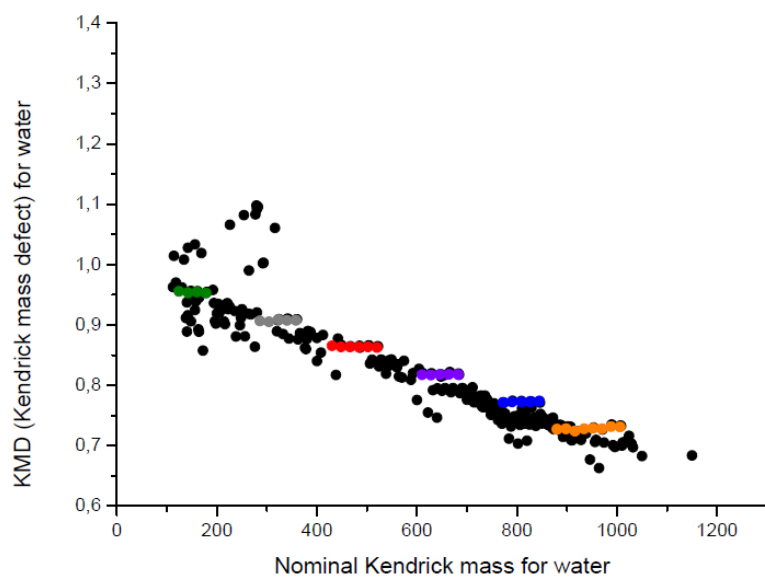

c)

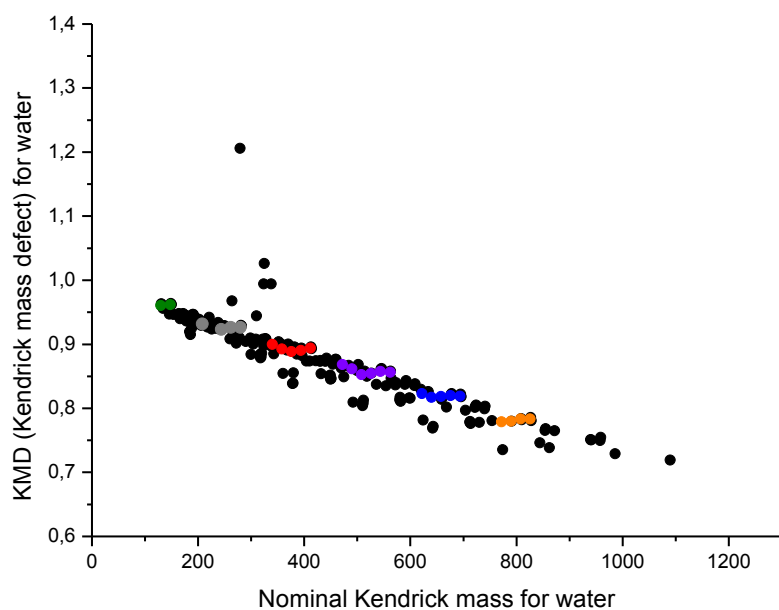

d)

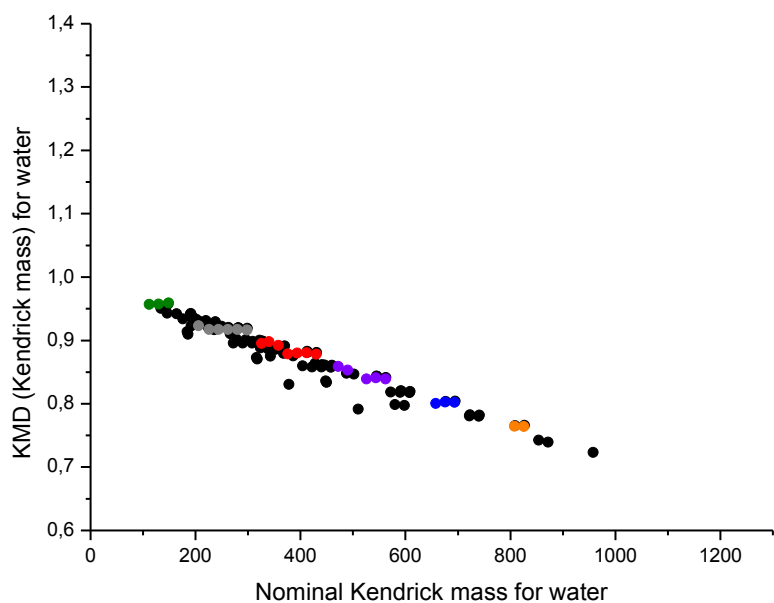

**Figure S2** Two dimensional Kendrick plots for mass increment  $H_2O$  showing the distribution of the Kendrick mass defect plotted against the nominal Kendrick mass of pseudo-molecular ions for caramelised: a) fructose, b) galactose, c) ribose and d) arabinose in the negative ion mode. The colours indicate the homologous series of monomers, dimers, trimers, tetramers, pentamers, hexamers

a)

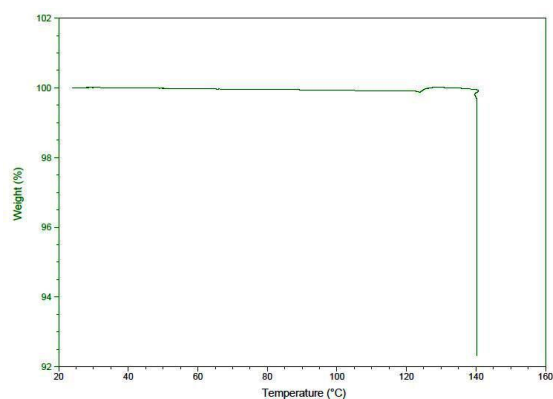

b)

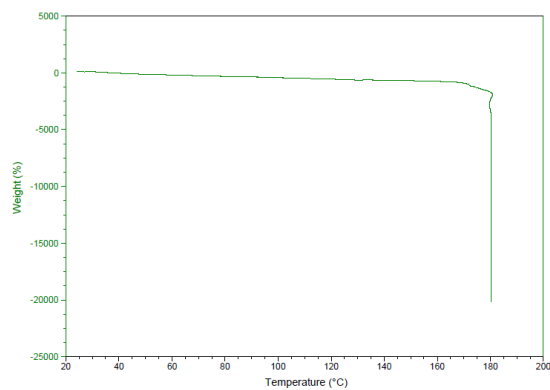

c)

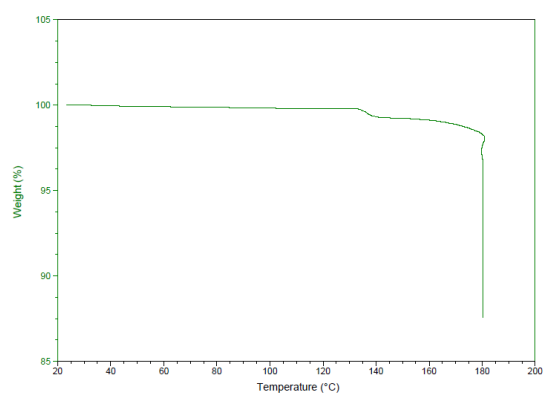

**Figure S3** Thermogravimetric curves of caramelised: a) fructose, b) galactose and c) mannose. The temperature was ramped from 25 to 180 °C (140 °C, fructose) and kept at final temperature for 2 h



**Figure S4** Infrared spectra of caramelized: a) fructose, b) galactose and c) mannose

a) IR: 3318.9, 2933.6, 2888.3, 1648.6, 1415.7, 1340.2, 1252.1, 1024.5, 978.9, 924.0, 866.4, 817.4, 778.6  $\text{cm}^{-1}$

b) IR: 3308.6, 2926.3, 2360.1, 2340.7, 1645.5, 1416.8, 1320.6, 1243.4, 1024.1, 773.7  $\text{cm}^{-1}$

c) IR: 3332.0, 2927.1, 2360.4, 1645.2, 1337.2, 995.8, 842.6, 783.14  $\text{cm}^{-1}$

a)

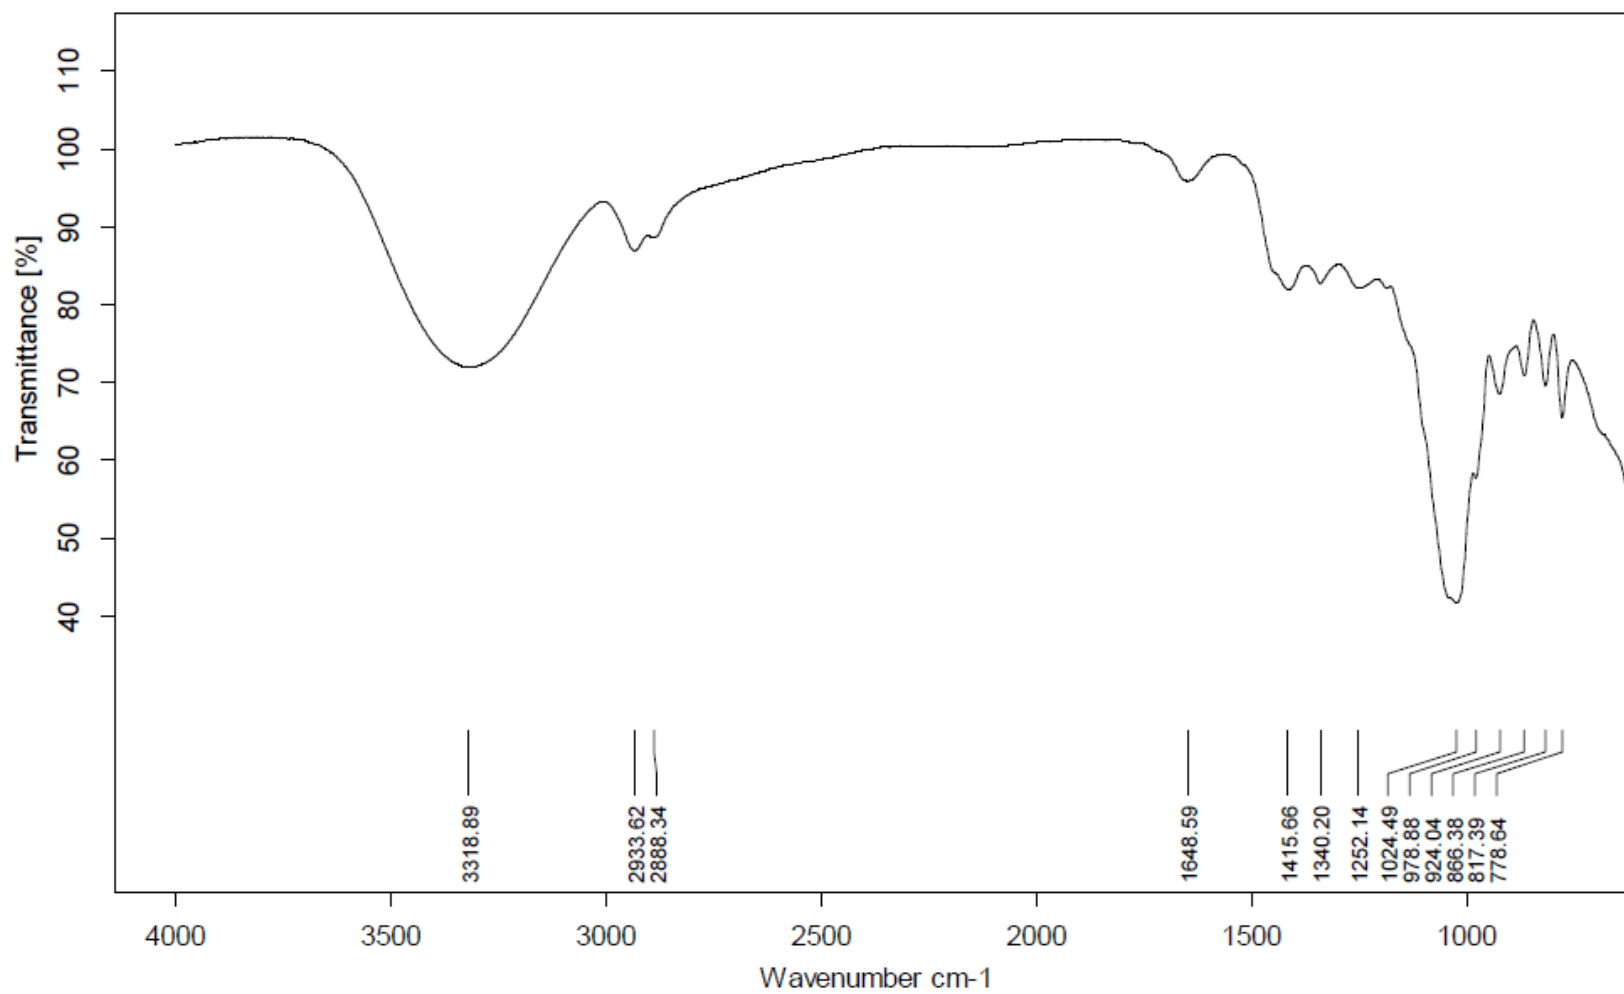

b)

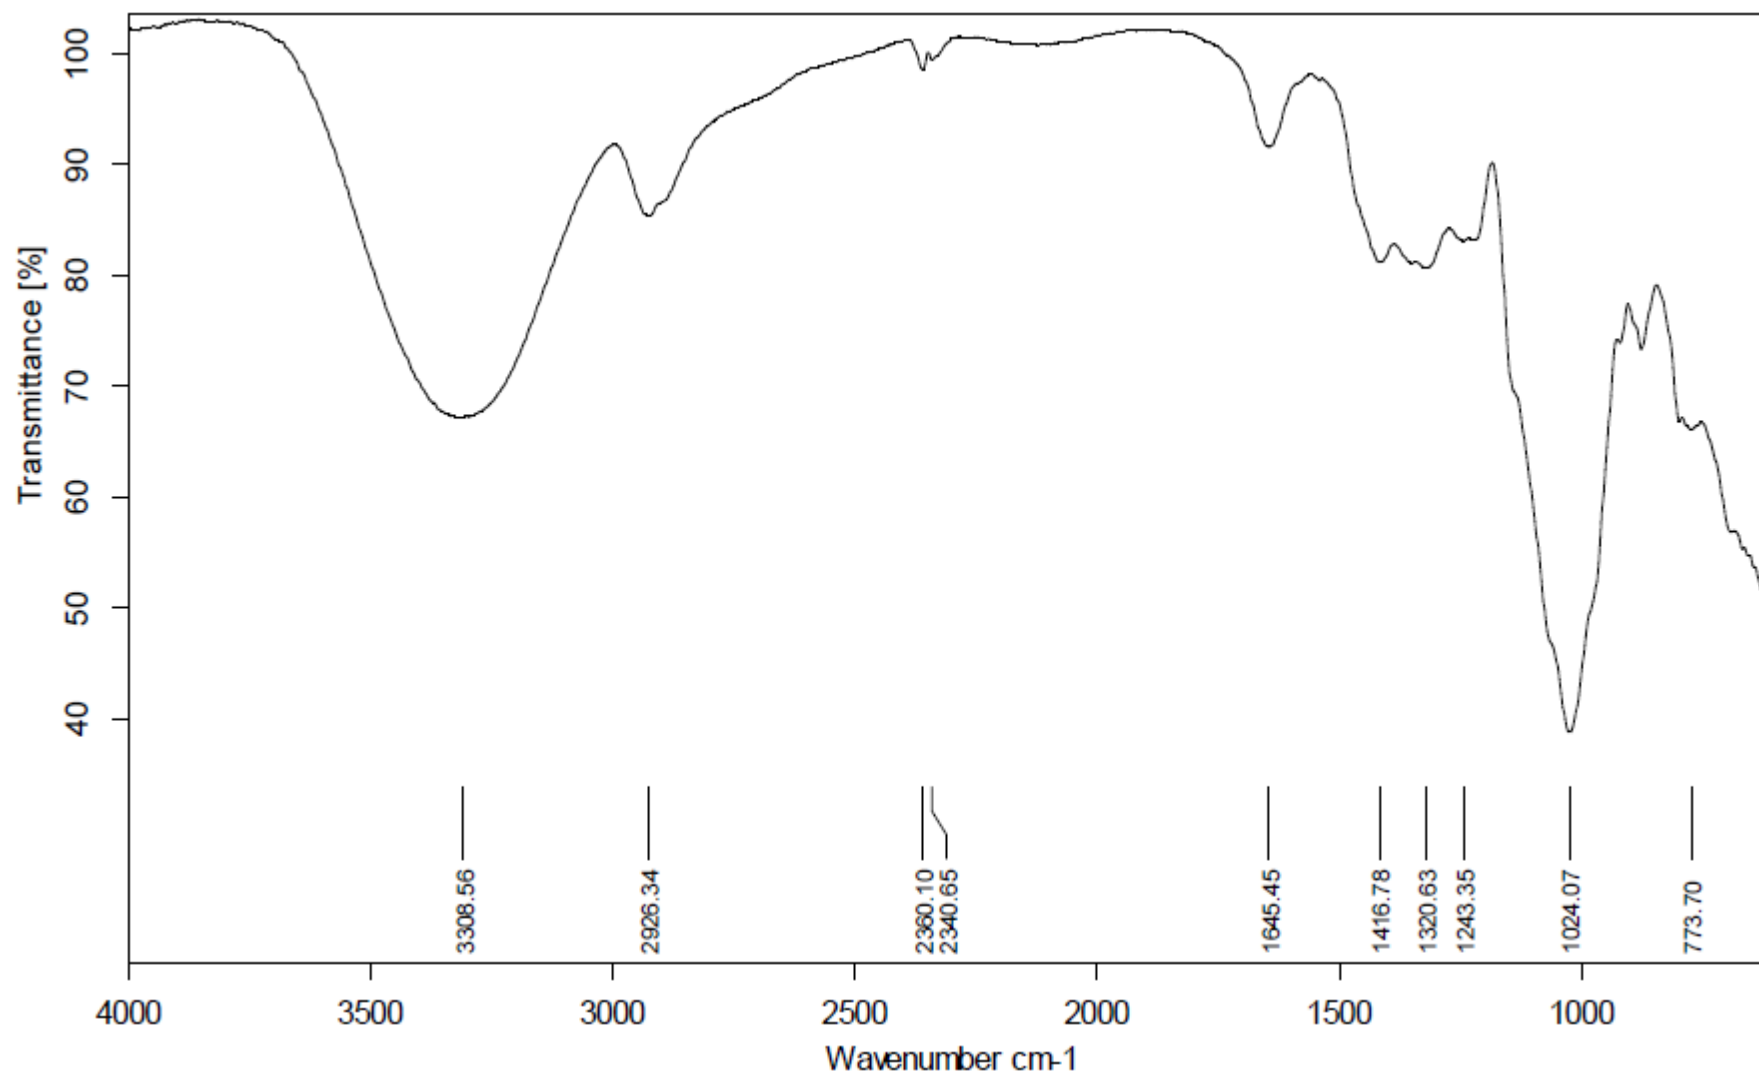

c)

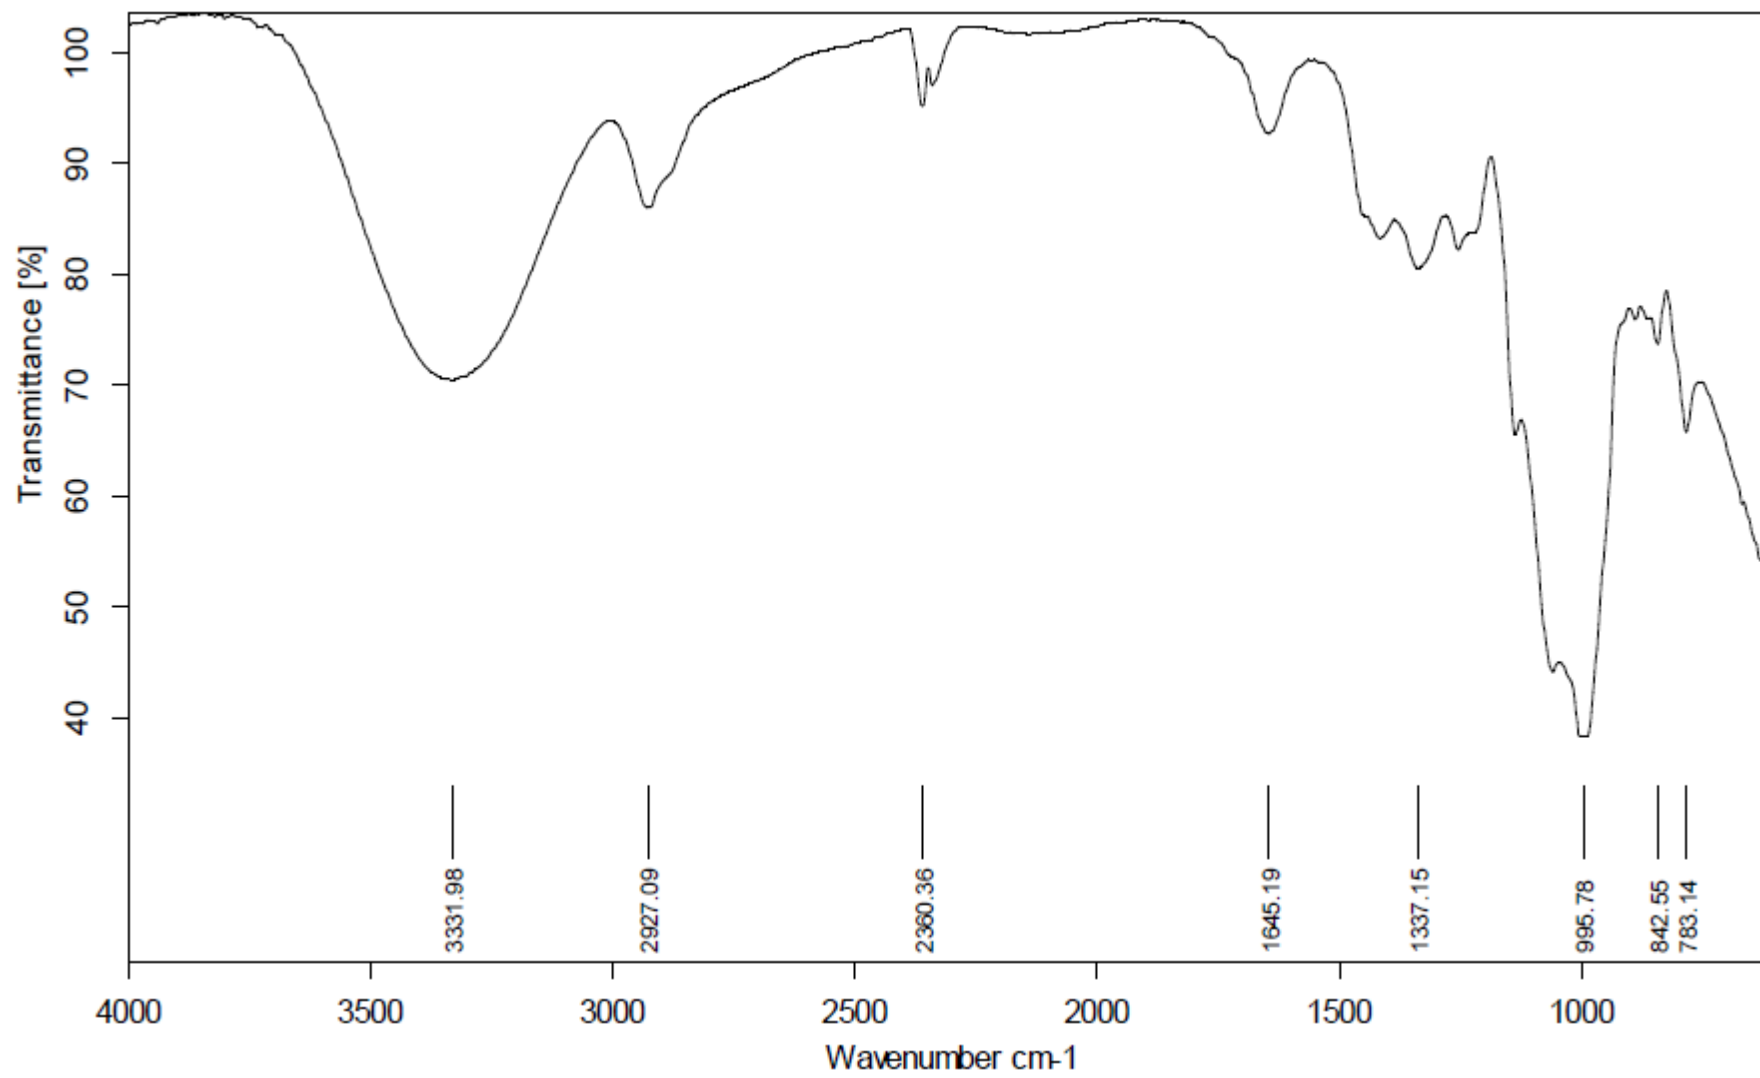

**Figure S5**  $^1\text{H}$  NMR spectra of caramelized: a) fructose, b) galactose and c) mannose

a)  $^1\text{H}$  NMR (400 MHz,  $\text{D}_2\text{O}$ ):  $\delta$  9.33 (CHO, m), 7.40 (m, Ar-H), 6.54 (m, Ar-H), 3.44-3.91 (m,  $>\text{CHOH}$ ), 1.98 (m,  $-\text{CH}_3$ ).

b)  $^1\text{H}$  NMR (400 MHz,  $\text{D}_2\text{O}$ ):  $\delta$  9.35 (CHO, m), 7.40 (m, Ar-H), 6.41 (m, Ar-H), 4.44-5.19 (m,  $>\text{C}=\text{C}-\text{H}$ ), 3.35-4.13 (m,  $>\text{CHOH}$ ).

c)  $^1\text{H}$  NMR (400 MHz,  $\text{D}_2\text{O}$ ):  $\delta$  9.31 (CHO, m), 7.39 (m, Ar-H), 6.52 (m, Ar-H), 4.92-5.25 (m,  $>\text{C}=\text{C}-\text{H}$ ), 3.22-4.37 (m,  $>\text{CHOH}$ ).

a)  $^1\text{H}$  NMR

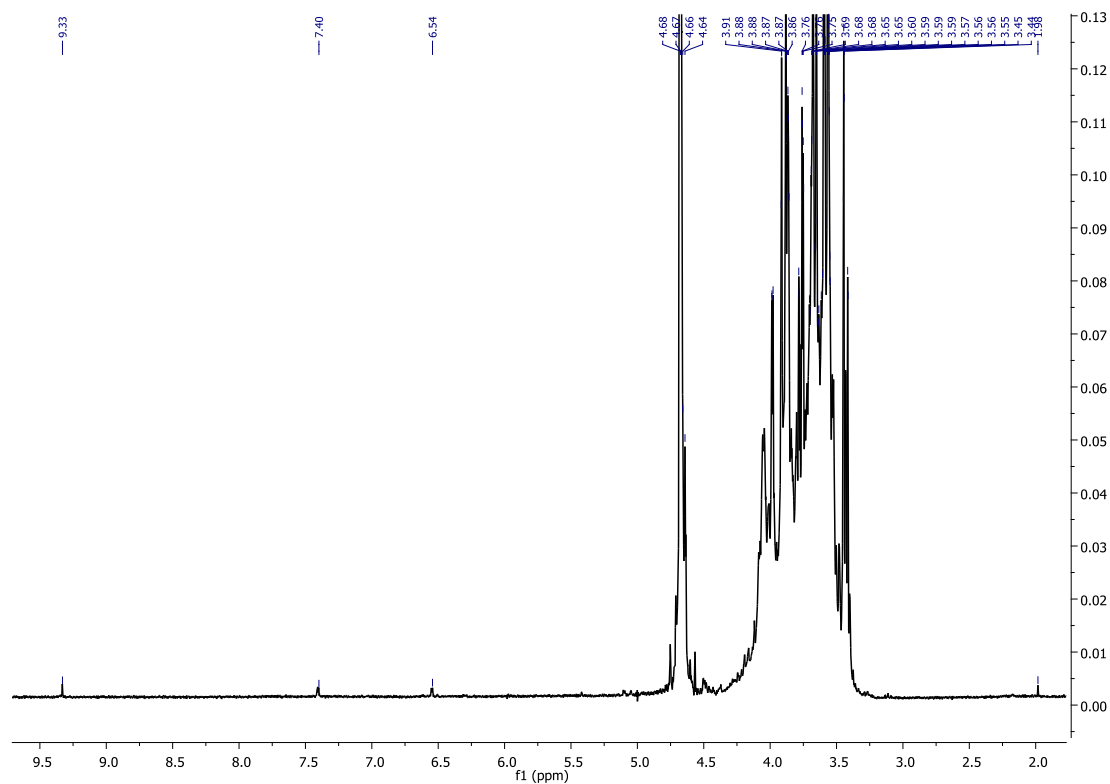

b)  $^1\text{H}$  NMR

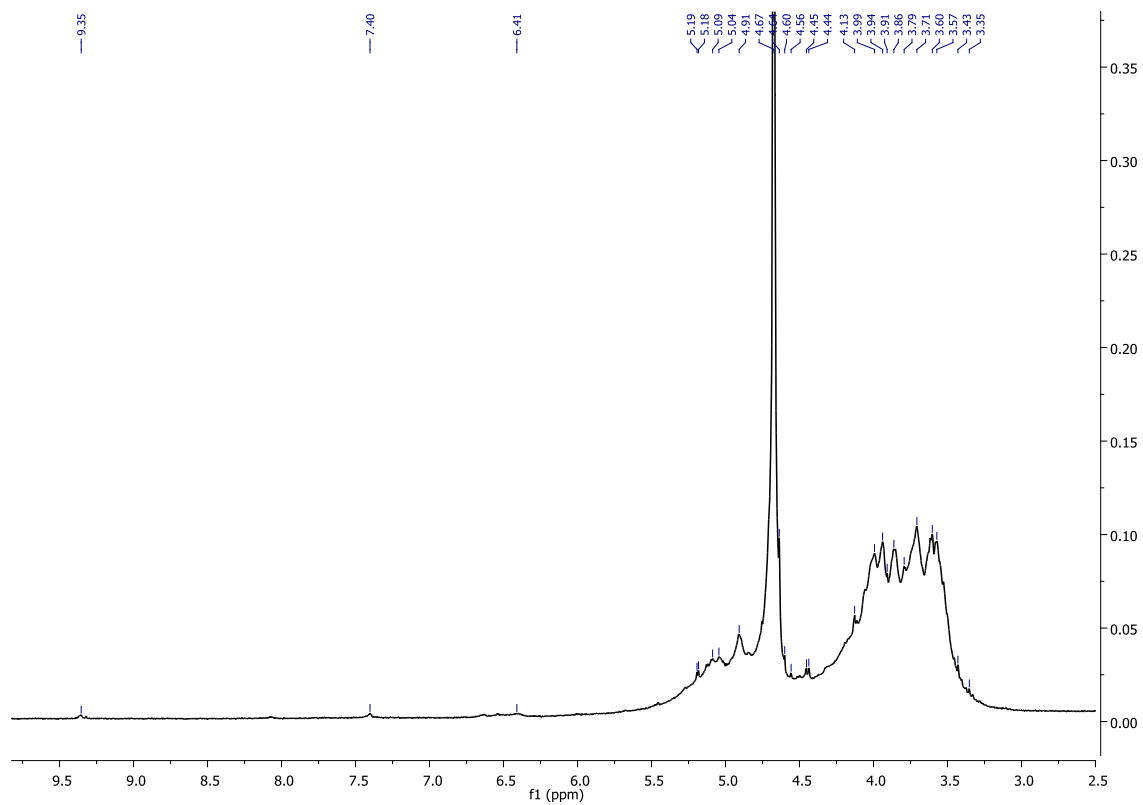

c)  $^1\text{H}$  NMR

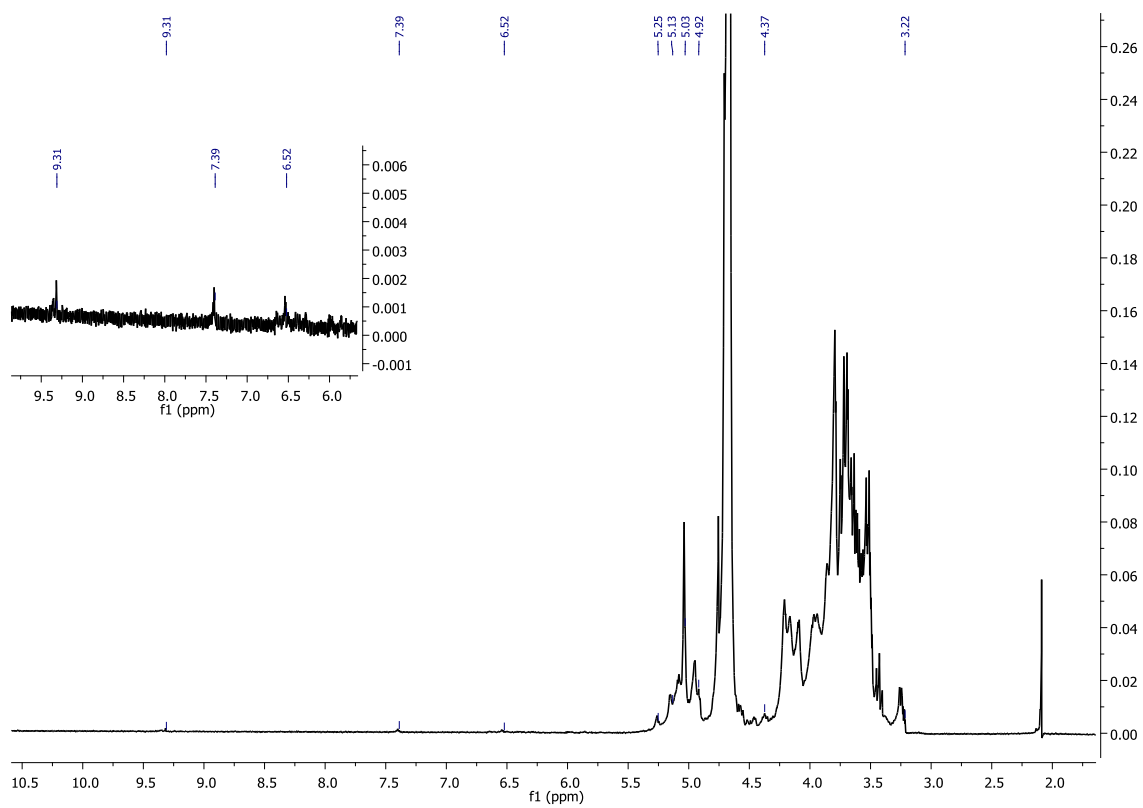

### Oligomers of hexose:

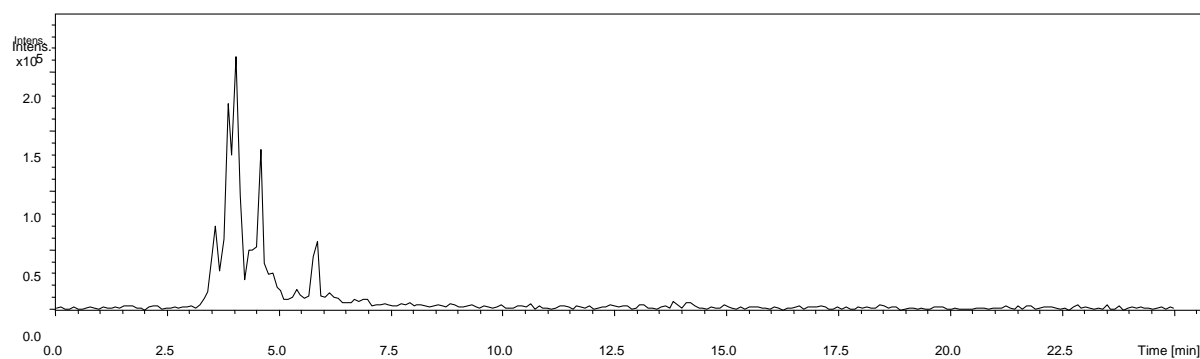

**Figure S6** EIC at  $m/z$  341.0 ( $C_{12}H_{22}O_{11}$ ) for caramelised fructose in the negative ion mode

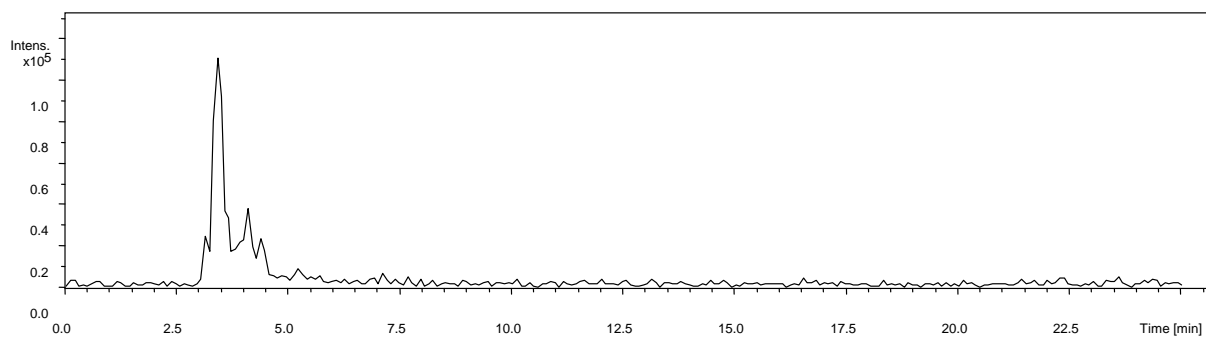

**Figure S7** EIC at  $m/z$  341.0 ( $C_{12}H_{22}O_{11}$ ) for caramelised galactose in the negative ion mode

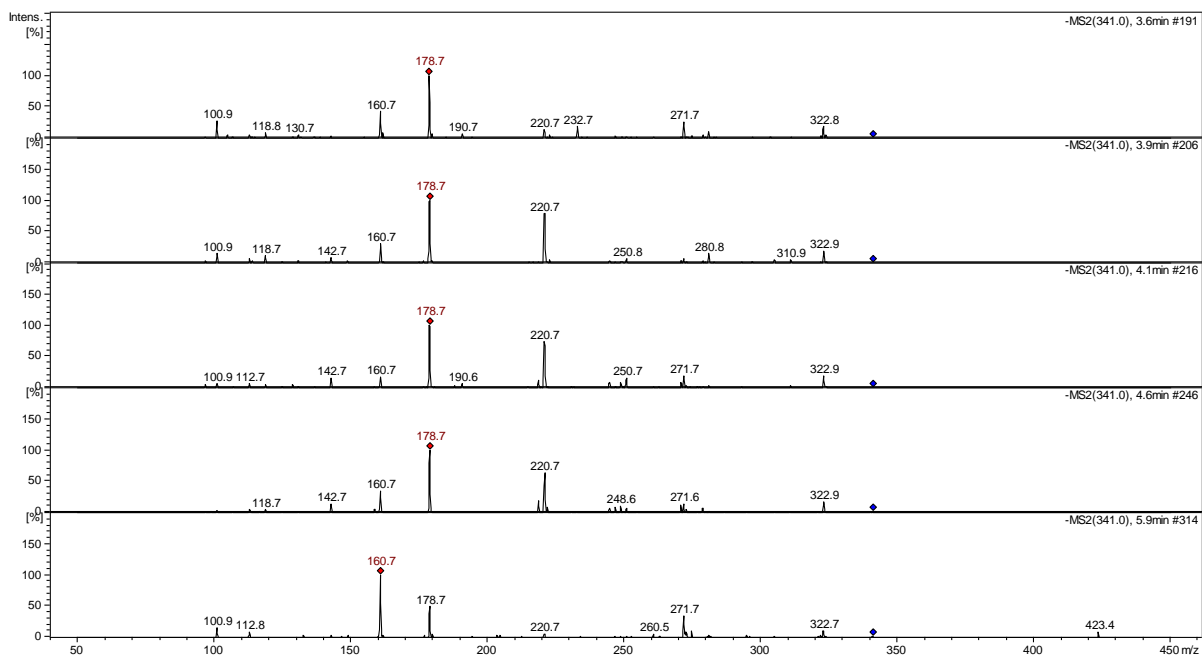

**Figure S8** MS<sup>2</sup> spectra of fragment at  $m/z$  341.0 (C<sub>12</sub>H<sub>22</sub>O<sub>11</sub>) for five chromatographic peaks of caramelised fructose in the negative ion mode

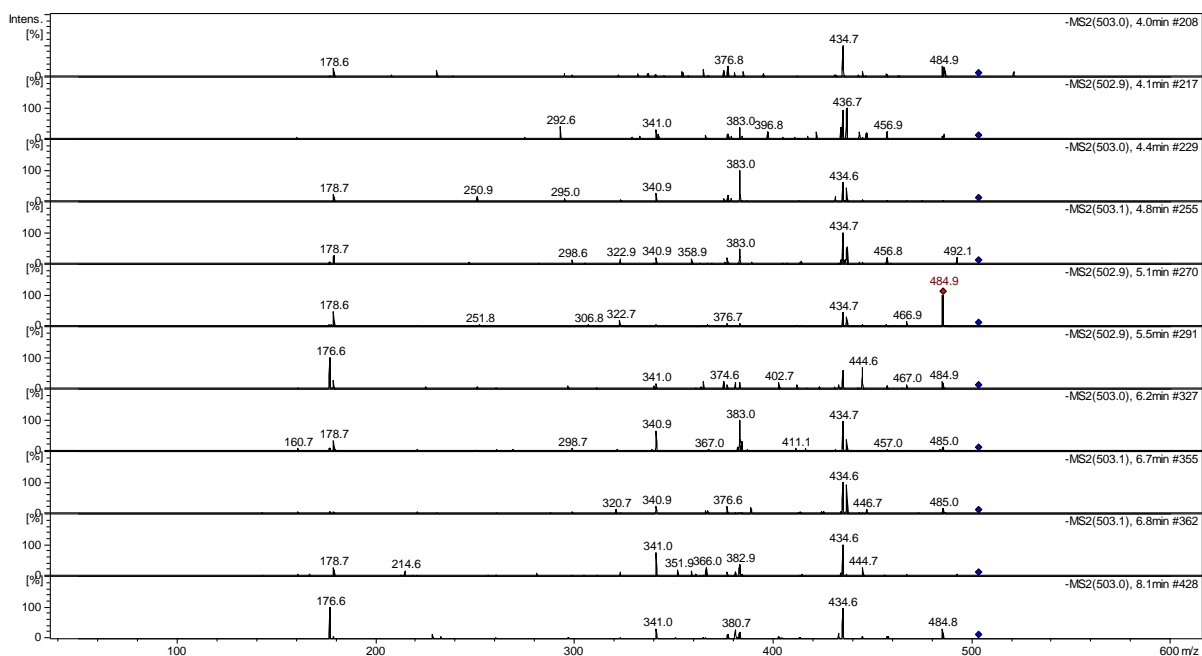

**Figure S9** MS<sup>2</sup> spectra of fragment at  $m/z$  503.0 (C<sub>18</sub>H<sub>32</sub>O<sub>16</sub>) for ten chromatographic peaks of caramelised fructose in the negative ion mode



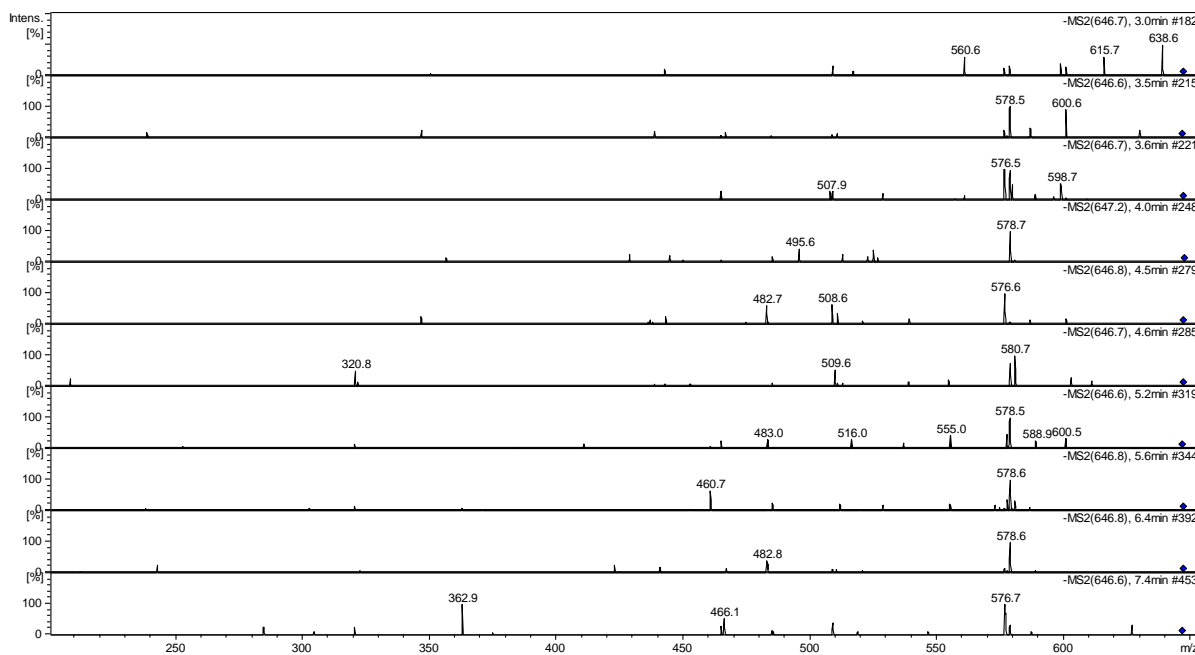

**Figure S10** MS<sup>2</sup> spectra of fragment at  $m/z$  647.0 (C<sub>24</sub>H<sub>40</sub>O<sub>20</sub>) for ten chromatographic peaks of caramelised fructose in the negative ion mode

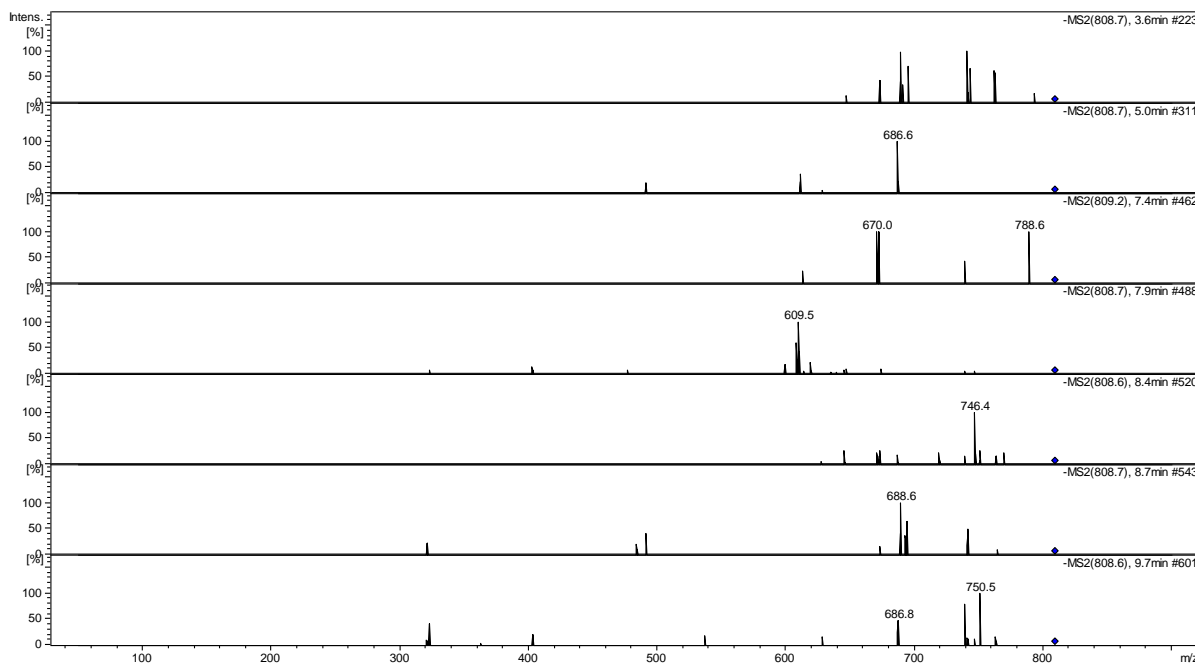

**Figure S11** MS<sup>2</sup> spectra of fragment at  $m/z$  809.0 (C<sub>30</sub>H<sub>50</sub>O<sub>25</sub>) for seven chromatographic peaks of caramelised fructose in the negative ion mode

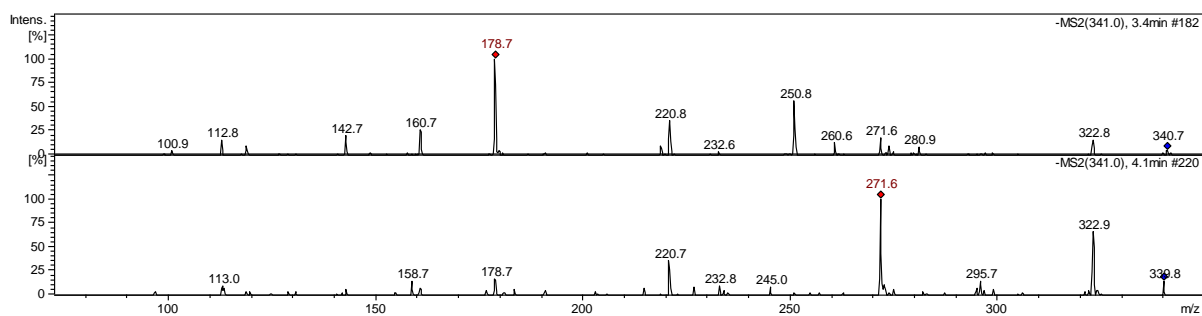

**Figure S12** MS<sup>2</sup> spectra of fragment at  $m/z$  341.0 (C<sub>12</sub>H<sub>22</sub>O<sub>11</sub>) for two chromatographic peaks of caramelised galactose in the negative ion mode

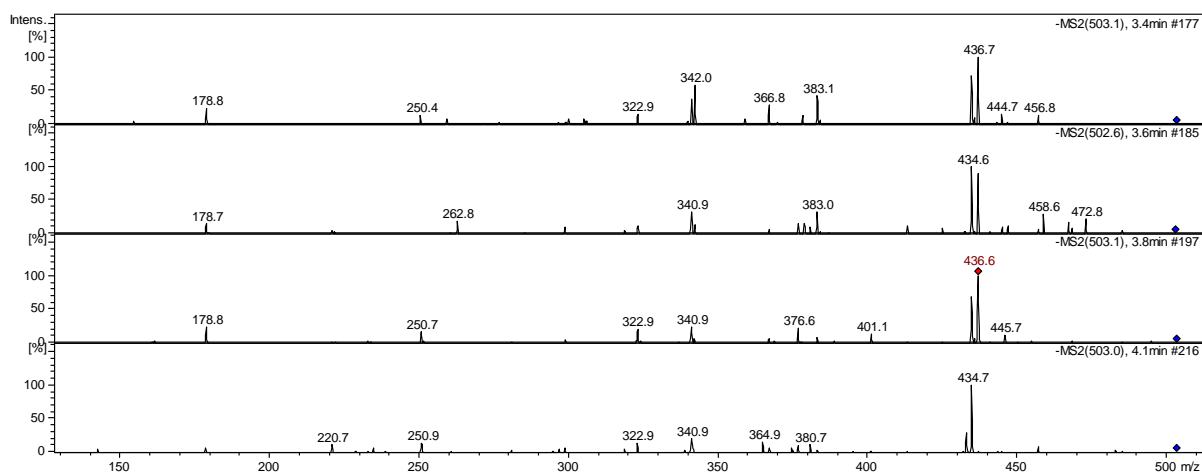

**Figure S13** MS<sup>2</sup> spectra of fragment at  $m/z$  503.0 (C<sub>18</sub>H<sub>32</sub>O<sub>16</sub>) for four chromatographic peaks of caramelised galactose in the negative ion mode

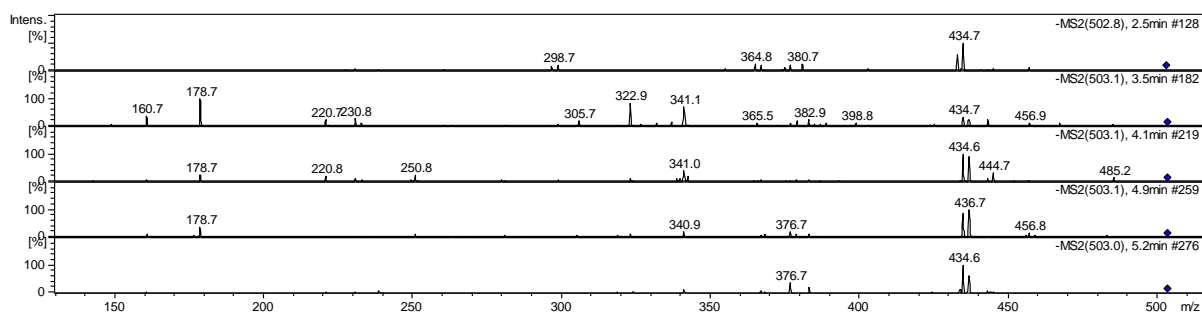

**Figure S14** MS<sup>2</sup> spectra of fragment at  $m/z$  503.0 (C<sub>18</sub>H<sub>32</sub>O<sub>16</sub>) for four chromatographic peaks of caramelised mannose in the negative ion mode

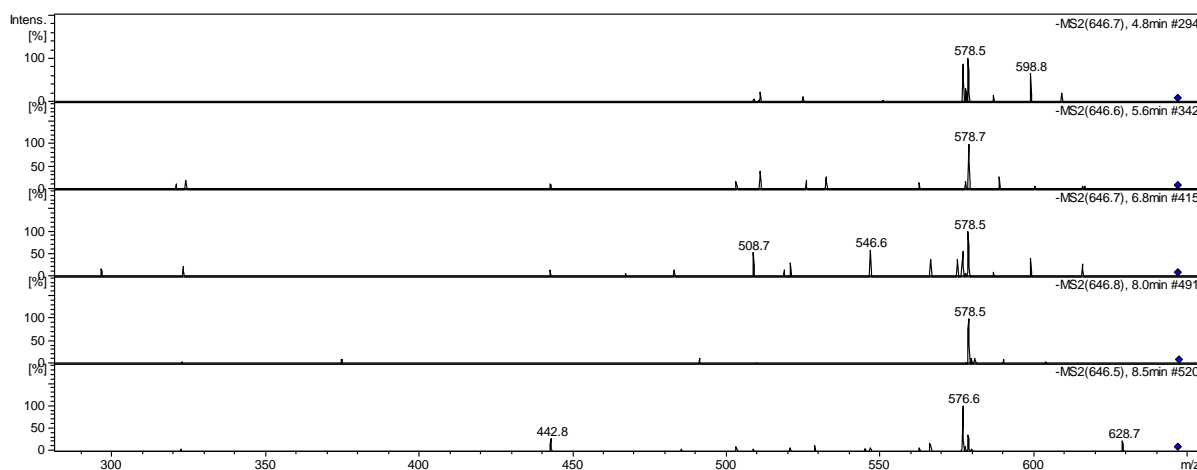

**Figure S15** MS<sup>2</sup> spectra of fragment at  $m/z$  647.0 ( $C_{24}H_{40}O_{20}$ ) for ten chromatographic peaks of caramelised mannose in the negative ion mode

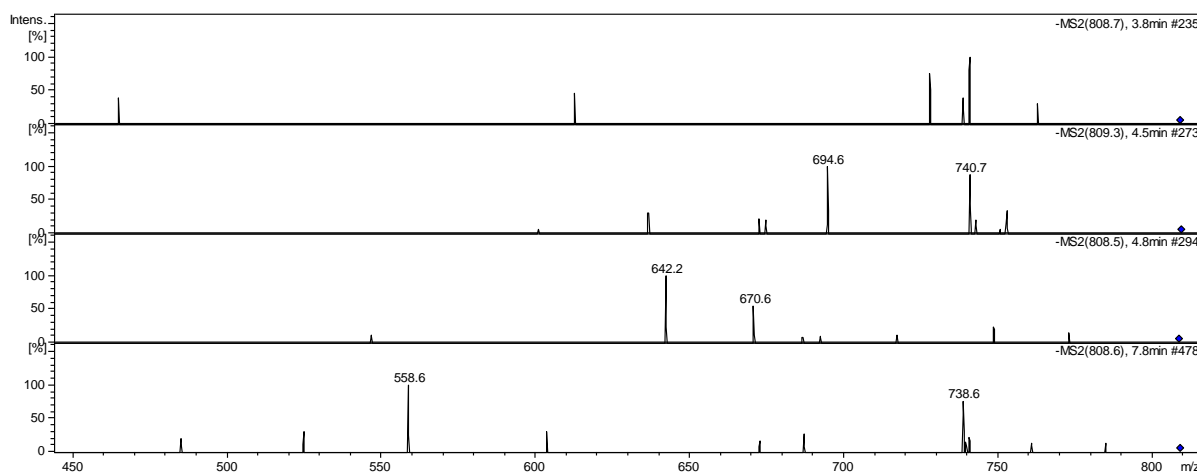

**Figure S16** MS<sup>2</sup> spectra of fragment at  $m/z$  809.0 ( $C_{30}H_{50}O_{25}$ ) for seven chromatographic peaks of caramelised mannose in the negative ion mode

## Dehydration products:

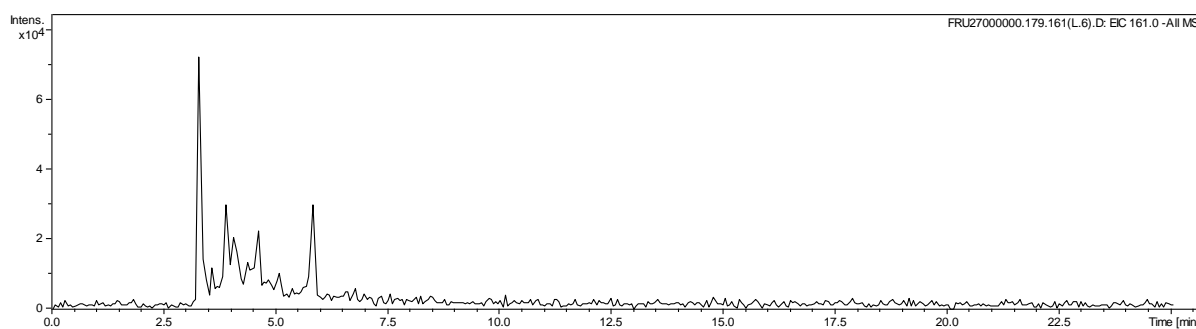

**Figure S17** EIC at  $m/z$  161.0 ( $C_6H_{10}O_5$ ) for caramelised fructose in the negative ion mode

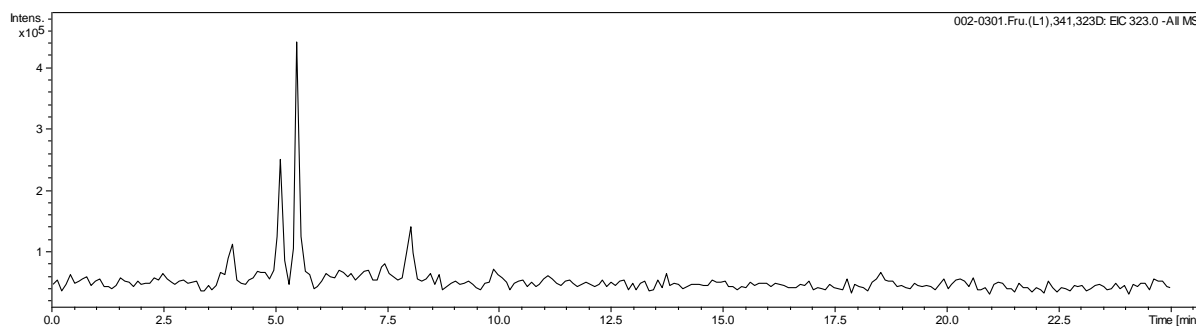

**Figure S18** EIC at  $m/z$  323.0 ( $C_{12}H_{20}O_{10}$ ) for caramelised fructose in the negative ion mode

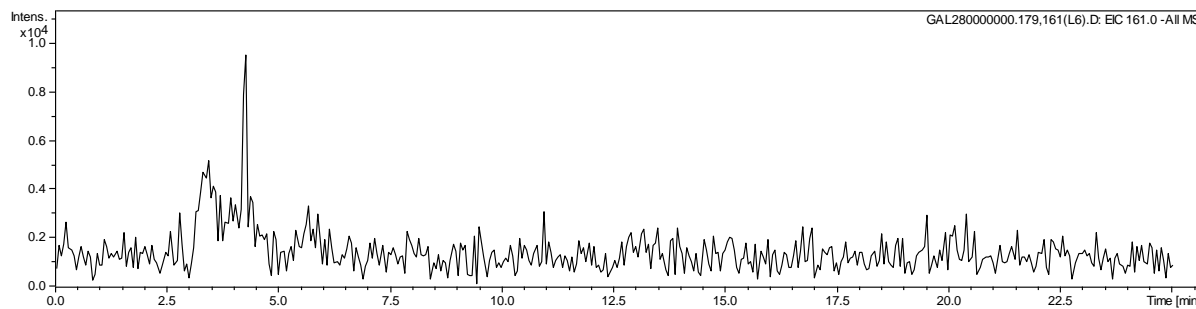

**Figure S19** EIC at  $m/z$  161.0 ( $C_6H_{10}O_5$ ) for caramelised galactose in the negative ion mode

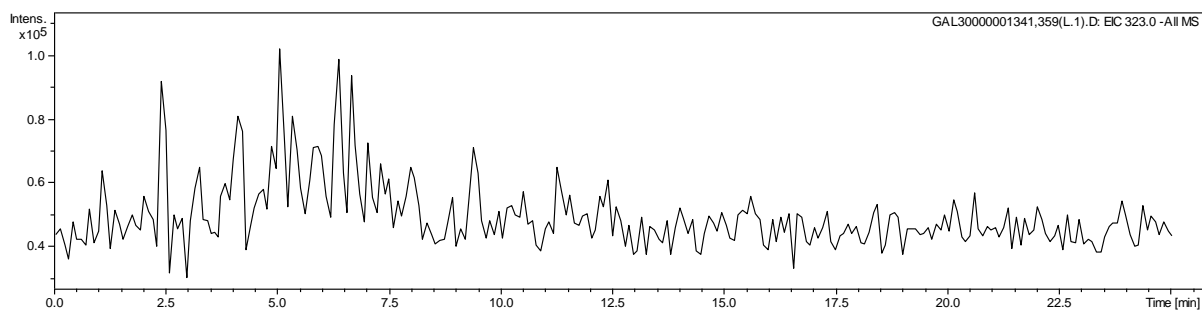

**Figure S20** EIC at  $m/z$  323.0 ( $C_{12}H_{20}O_{10}$ ) for caramelised galactose in the negative ion mode

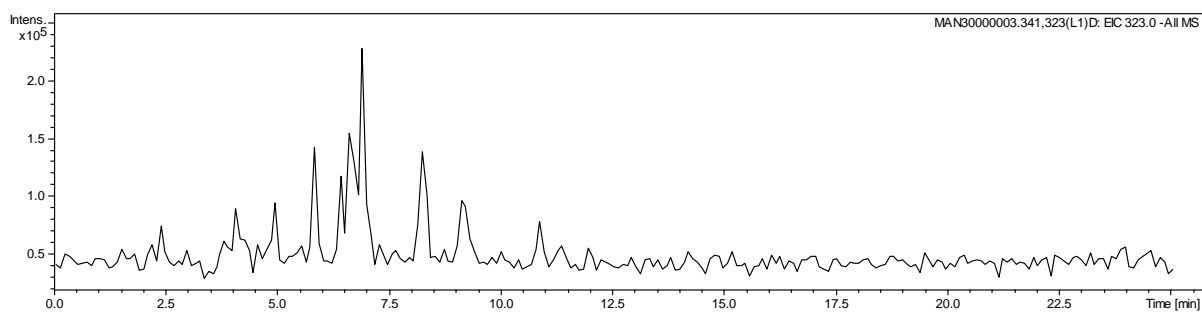

**Figure S21** EIC at  $m/z$  323.0 ( $C_{12}H_{20}O_{10}$ ) for caramelised mannose in the negative ion mode

### Hydration products:

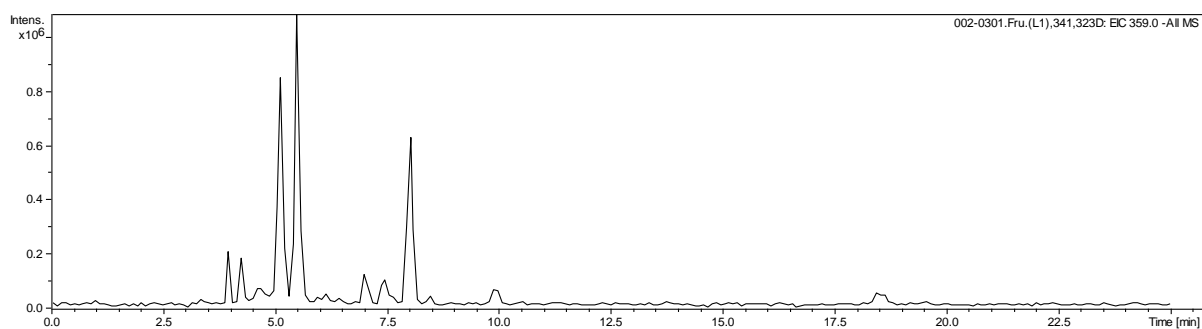

**Figure S22** EIC at  $m/z$  359.0 ( $C_{12}H_{24}O_{12}$ ) for caramelised fructose in the negative ion mode

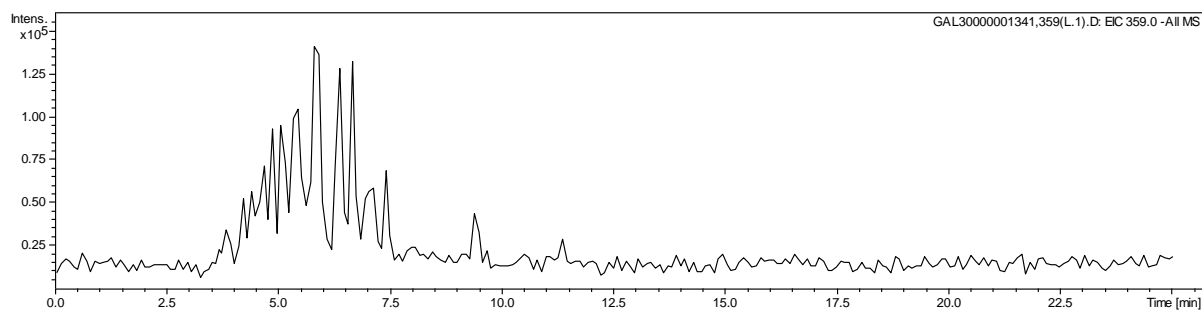

**Figure S23** EIC at  $m/z$  359.0 ( $C_{12}H_{24}O_{12}$ ) for caramelised galactose in the negative ion mode

### Monomer and oligomers of pentose:

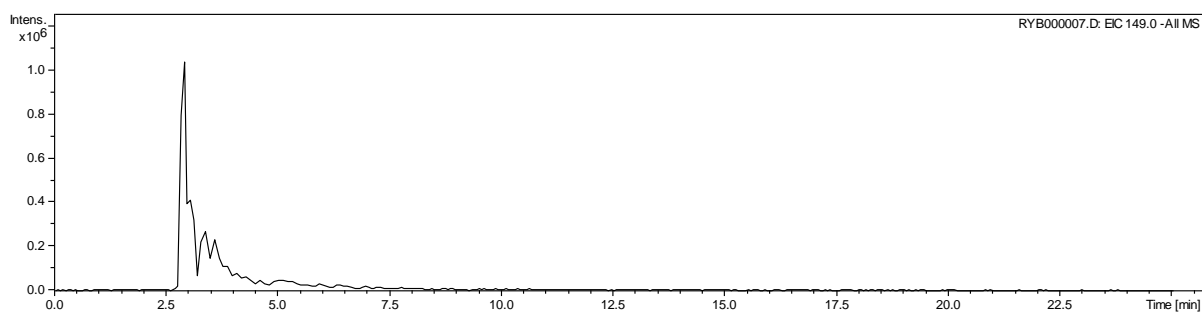

**Figure S24** EIC at  $m/z$  149.0 ( $C_5H_{10}O_5$ ) for caramelised rybose in the negative ion mode

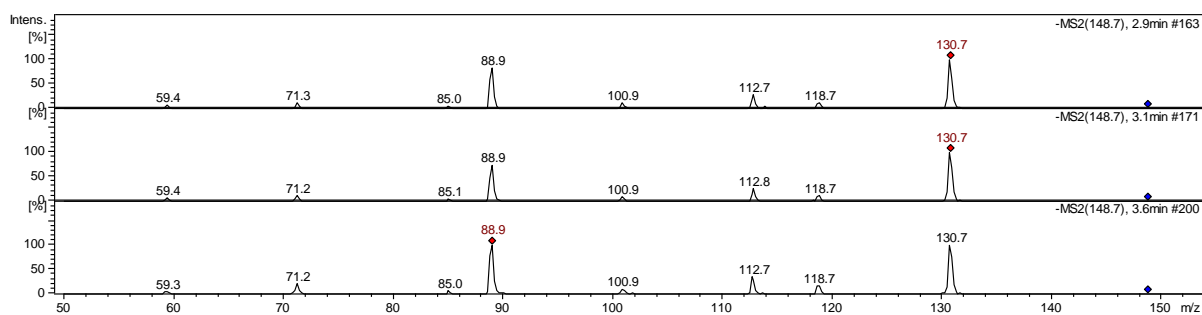

**Figure S25**  $MS^2$  spectra of fragment at  $m/z$  149.0 ( $C_5H_{10}O_5$ ) for three chromatographic peaks of caramelised rybose in the negative ion mode

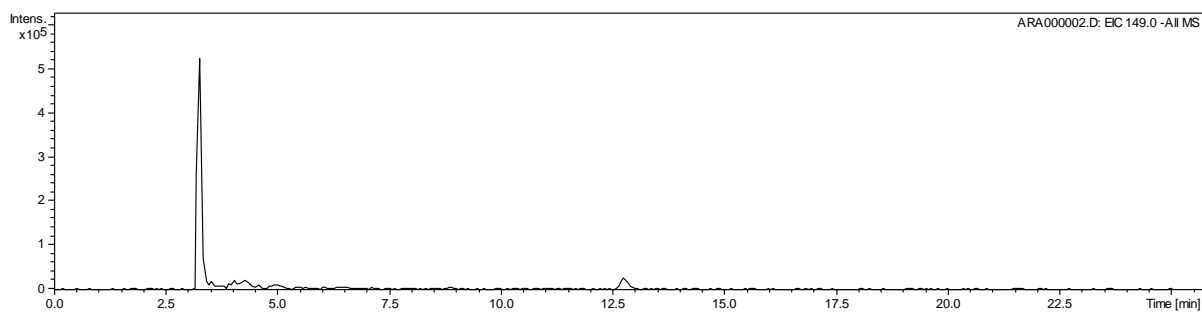

**Figure S26** EIC at  $m/z$  149.0 ( $C_5H_{10}O_5$ ) for caramelised arabinose in the negative ion mode

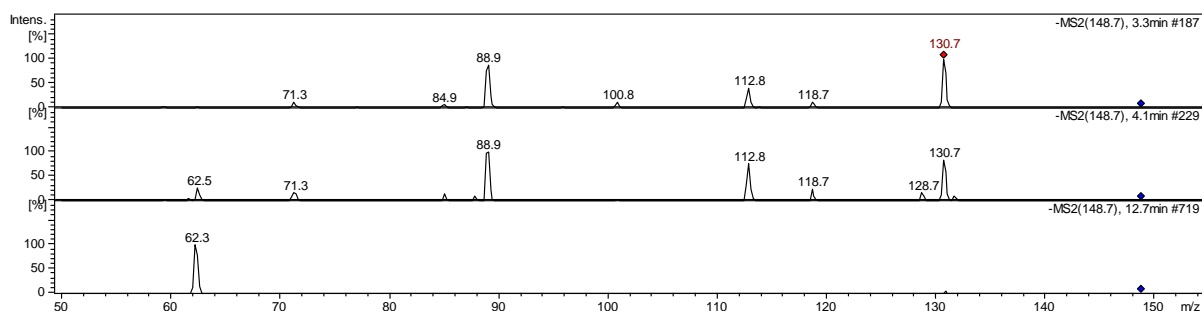

**Figure S27** MS<sup>2</sup> spectra of fragment at  $m/z$  149 (C<sub>5</sub>H<sub>8</sub>O<sub>4</sub>) for three chromatographic peaks of caramelised arabinose in the negative ion mode

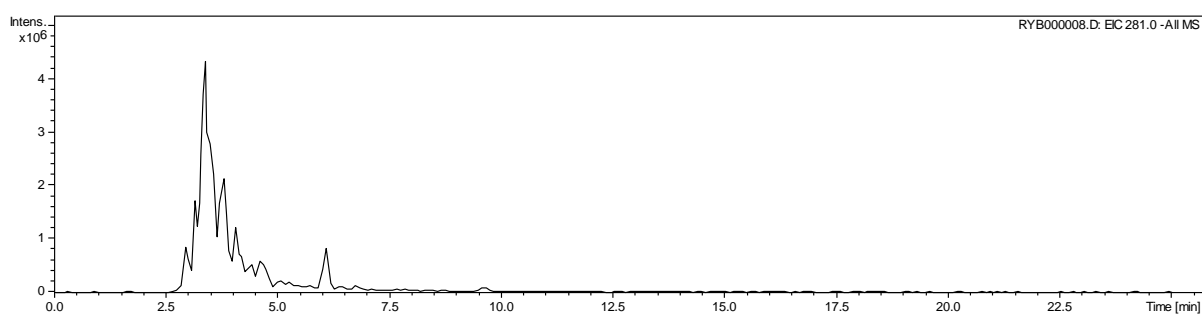

**Figure S28** EIC at  $m/z$  281.0 (C<sub>10</sub>H<sub>18</sub>O<sub>9</sub>) for caramelised rybose in the negative ion mode

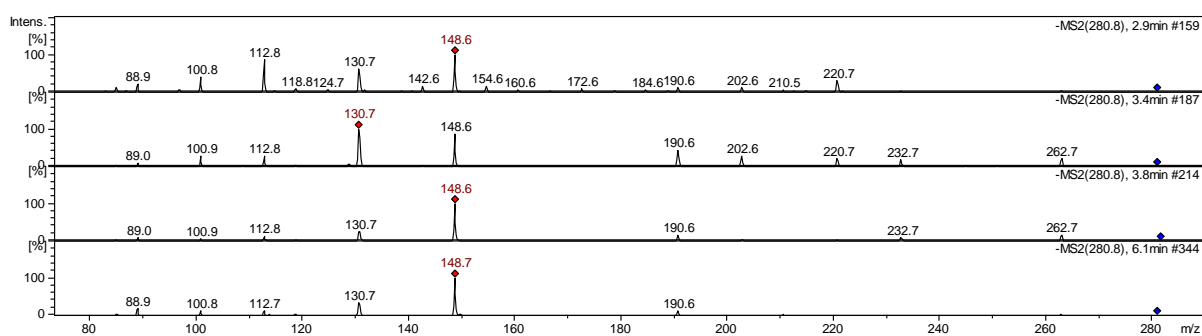

**Figure S29** MS<sup>2</sup> spectra of fragment at  $m/z$  281.0 (C<sub>10</sub>H<sub>18</sub>O<sub>9</sub>) for four chromatographic peaks of caramelised rybose in the negative ion mode



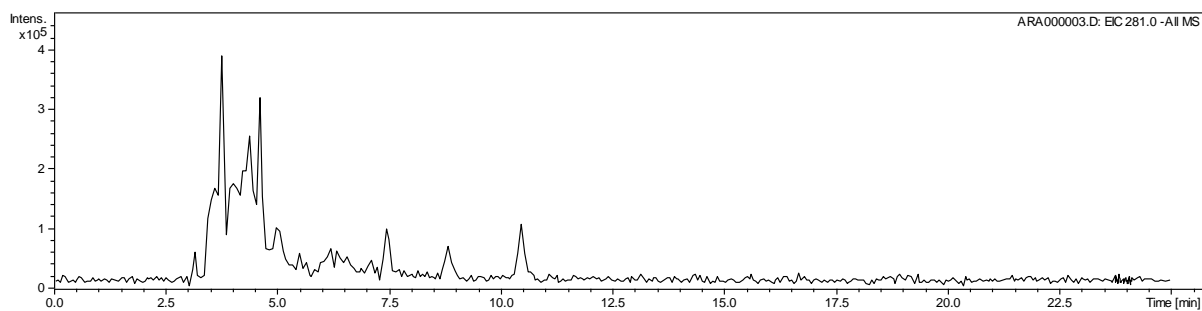

**Figure S30** EIC at  $m/z$  281.0 ( $C_{10}H_{18}O_9$ ) for caramelised arabinose in the negative ion mode

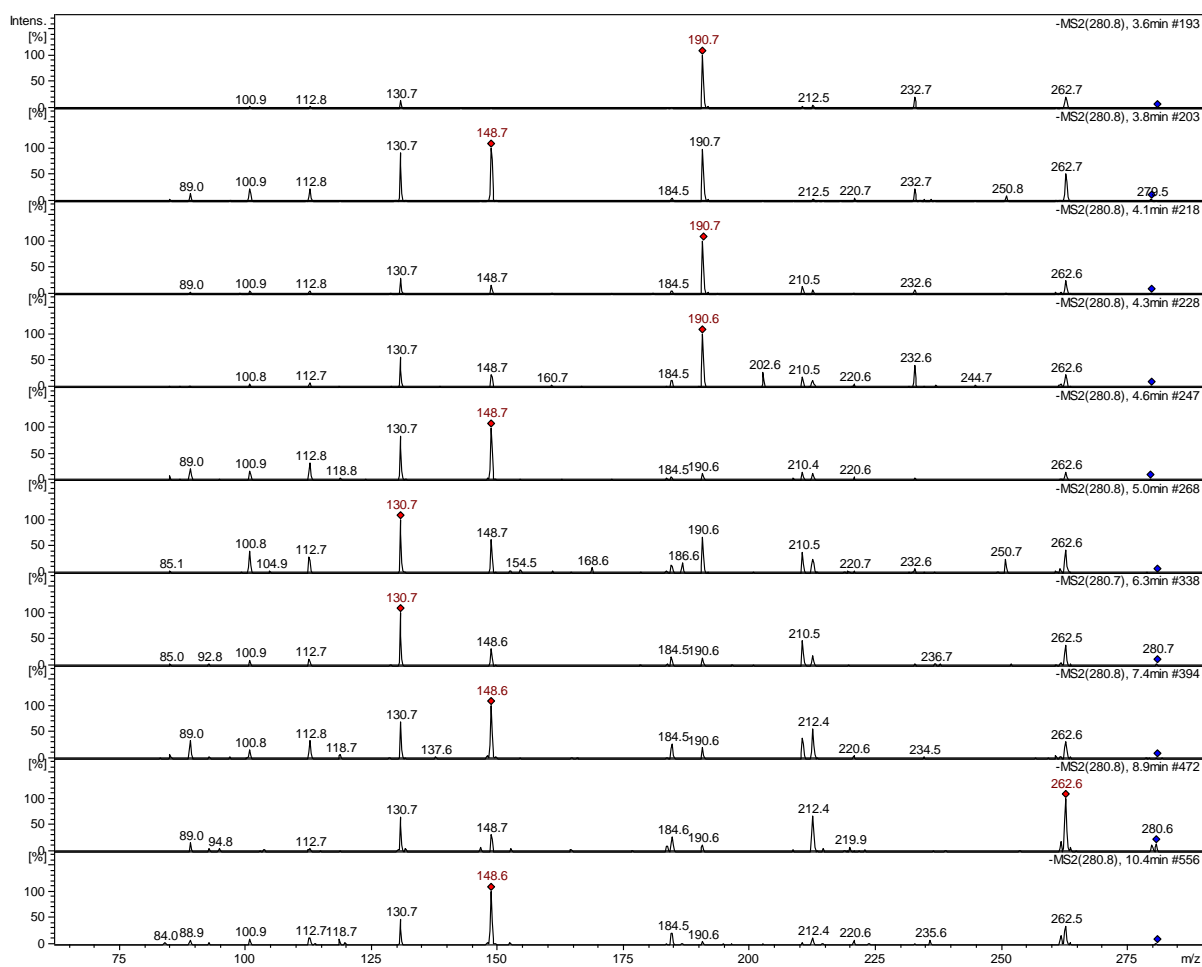

**Figure S31**  $MS^2$  spectra of fragment at  $m/z$  281.0 ( $C_{10}H_{18}O_9$ ) for ten chromatographic peaks of caramelised arabinose in the negative ion mode

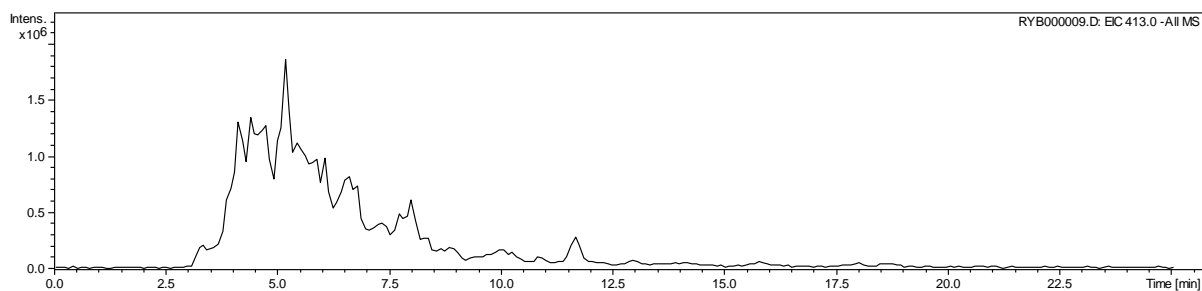

**Figure S32** EIC at  $m/z$  413.0 ( $C_{15}H_{26}O_{13}$ ) for caramelised rybose in the negative ion mode

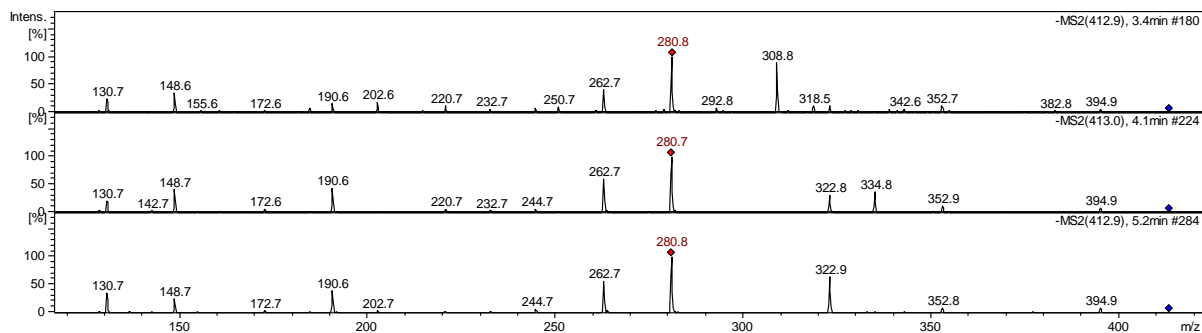

**Figure S33**  $MS^2$  spectra of fragment at  $m/z$  413.0 ( $C_{15}H_{26}O_{13}$ ) for three chromatographic peaks of caramelised rybose in the negative ion mode

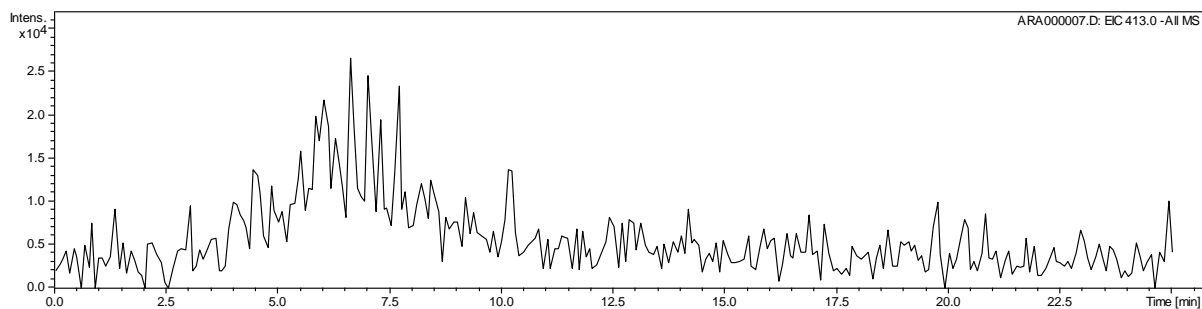

**Figure S34** EIC at  $m/z$  413.0 ( $C_{15}H_{26}O_{13}$ ) for caramelised arabinose in the negative ion mode

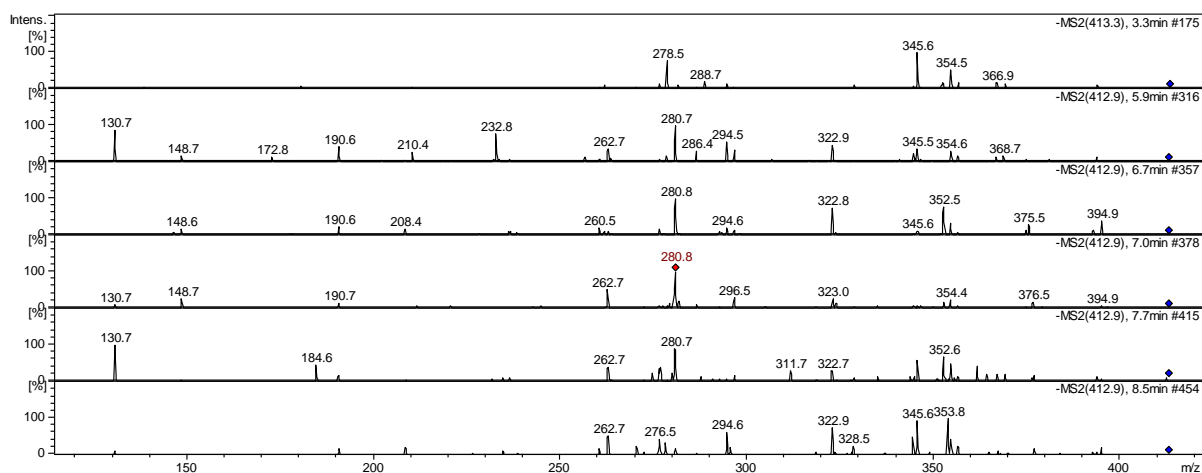

**Figure S35** MS<sup>2</sup> spectra of fragment at  $m/z$  413.0 (C<sub>15</sub>H<sub>26</sub>O<sub>13</sub>) for six chromatographic peaks of caramelised arabinose in the negative ion mode

### Dehydrated pentoses:

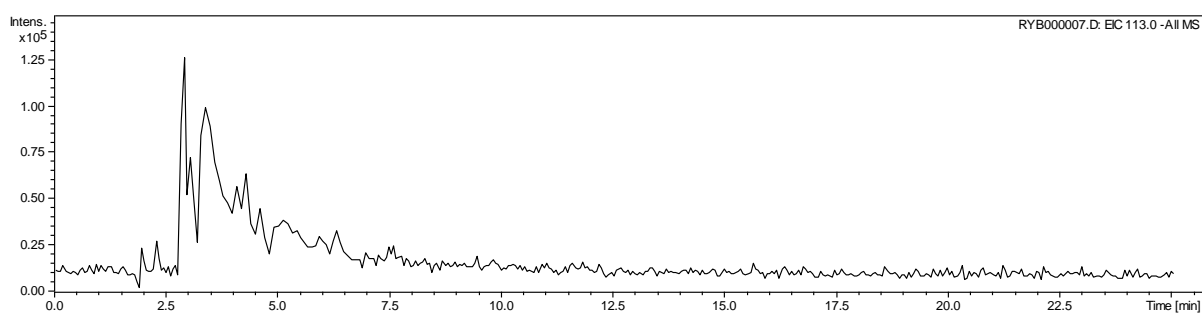

**Figure S36** EIC at  $m/z$  113.0 (C<sub>5</sub>H<sub>6</sub>O<sub>3</sub>) for caramelised rybose in the negative ion mode

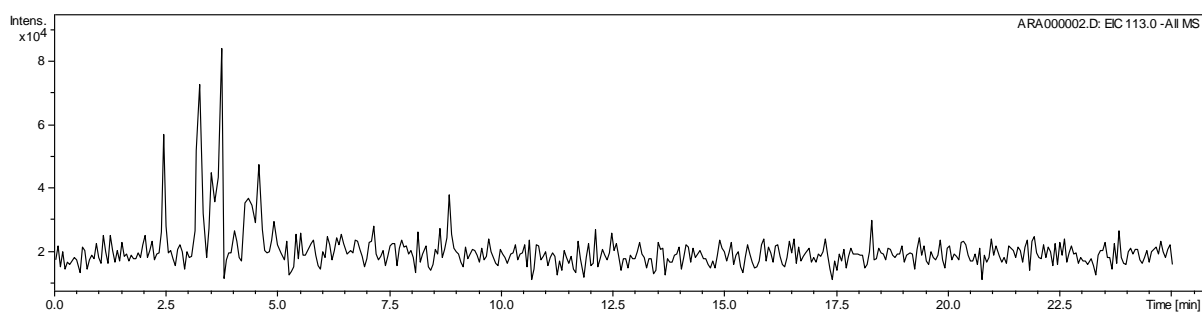

**Figure S37** EIC at  $m/z$  113.0 (C<sub>5</sub>H<sub>6</sub>O<sub>3</sub>) for caramelised arabinose in the negative ion mode

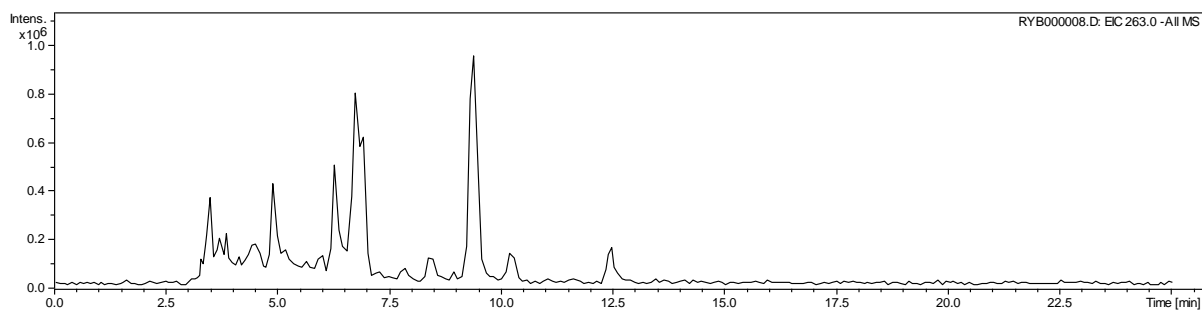

**Figure S38** EIC at  $m/z$  263.0 ( $C_{10}H_{16}O_8$ ) for caramelised rybose in the negative ion mode

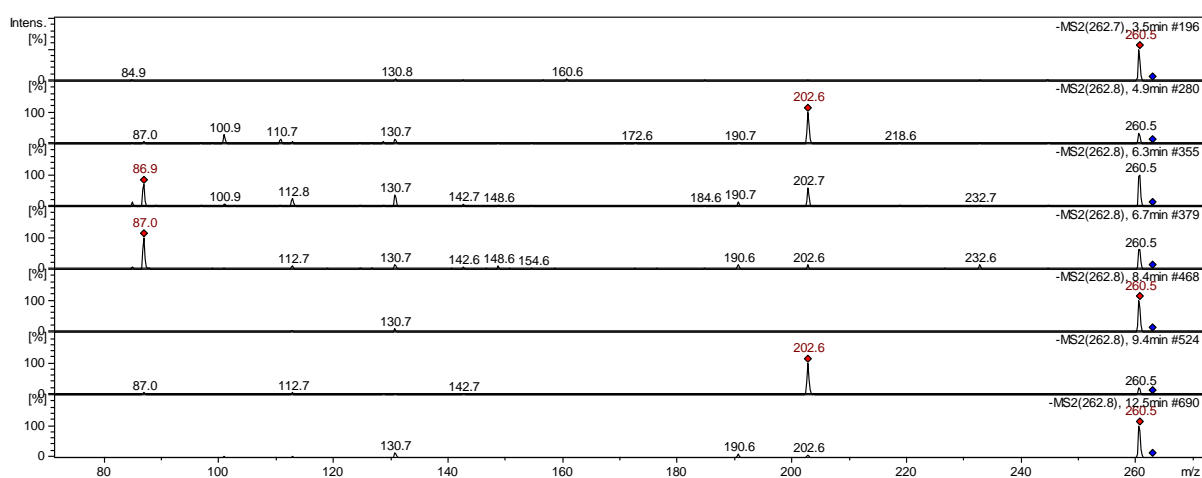

**Figure S39**  $MS^2$  spectra of fragment at  $m/z$  263.0 ( $C_{10}H_{16}O_8$ ) for seven chromatographic peaks of caramelised rybose in the negative ion mode

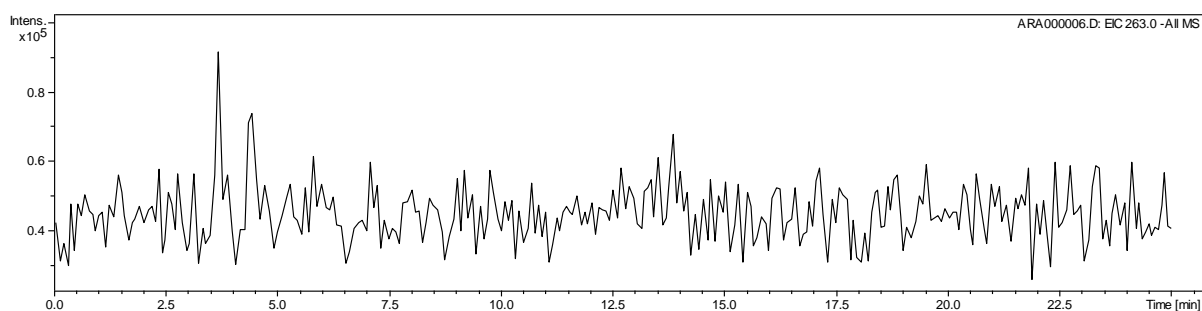

**Figure S40** EIC at  $m/z$  263.0 ( $C_{10}H_{16}O_8$ ) for caramelised arabinose in the negative ion mode

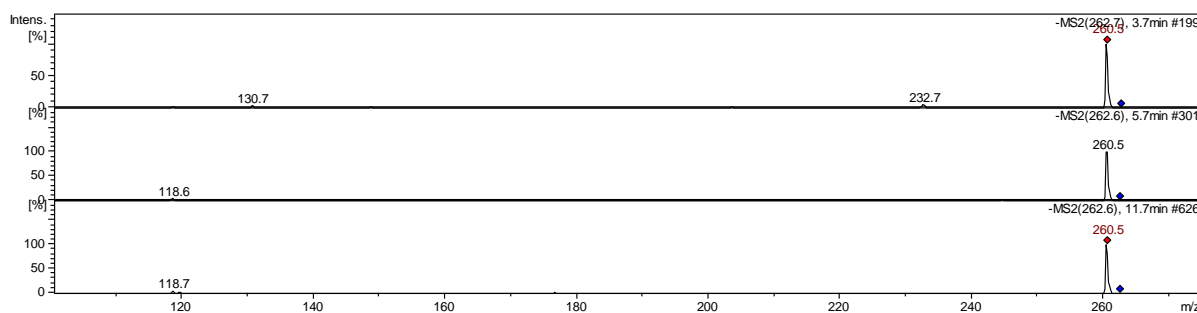

**Figure S41** MS<sup>2</sup> spectra of fragment at  $m/z$ , 263 ( $C_{10}H_{16}O_8$ ) for three chromatographic peaks of caramelised arabinose in the negative ion mode

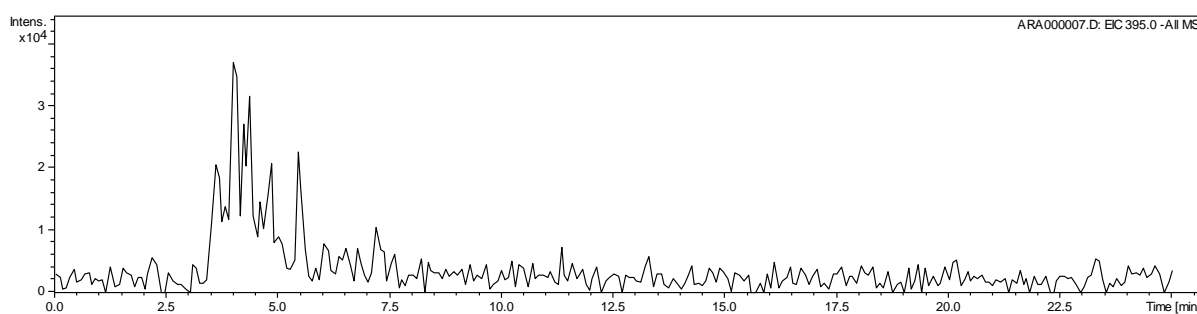

**Figure S42** EIC at  $m/z$  395.0 ( $C_{15}H_{24}O_{12}$ ) for caramelised arabinose in the negative ion mode

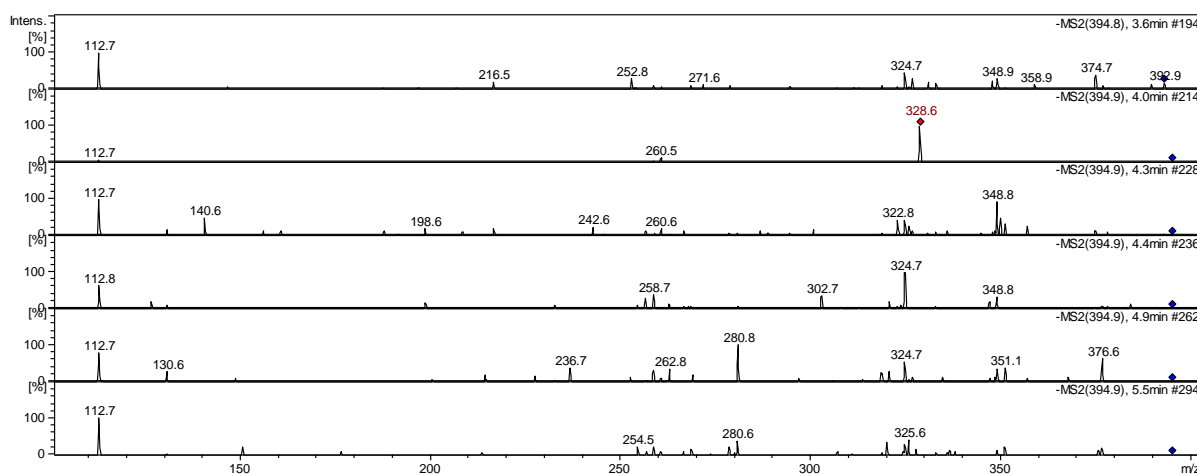

**Figure S43** MS<sup>2</sup> spectra of fragment at  $m/z$  395.0 ( $C_{15}H_{24}O_{12}$ ) for six chromatographic peaks of caramelised arabinose in the negative ion mode

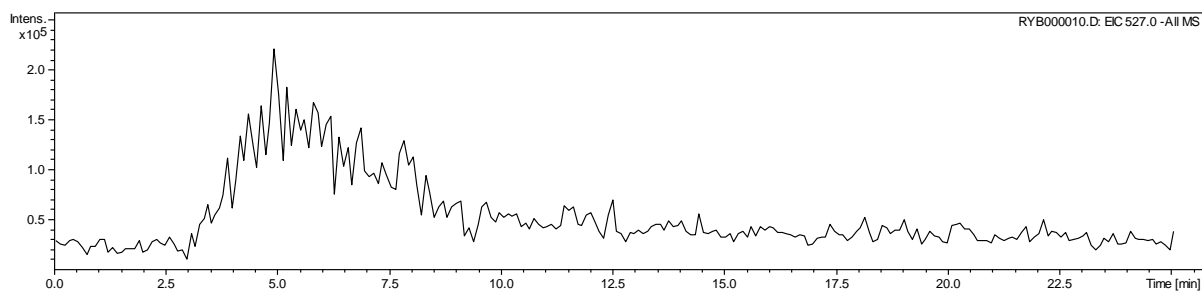

**Figure S44** EIC at  $m/z$  527.0 ( $C_{20}H_{32}O_{16}$ ) for caramelised rybose in the negative ion mode

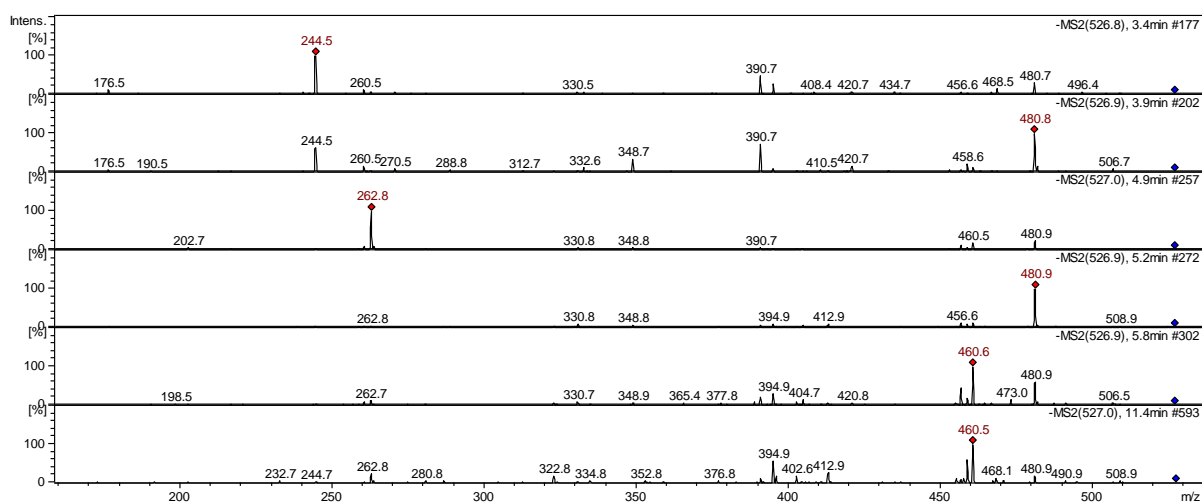

**Figure S45**  $MS^2$  spectra of fragment at  $m/z$  527.0 ( $C_{20}H_{32}O_{16}$ ) for six chromatographic peaks of caramelised rybose in the negative ion mode

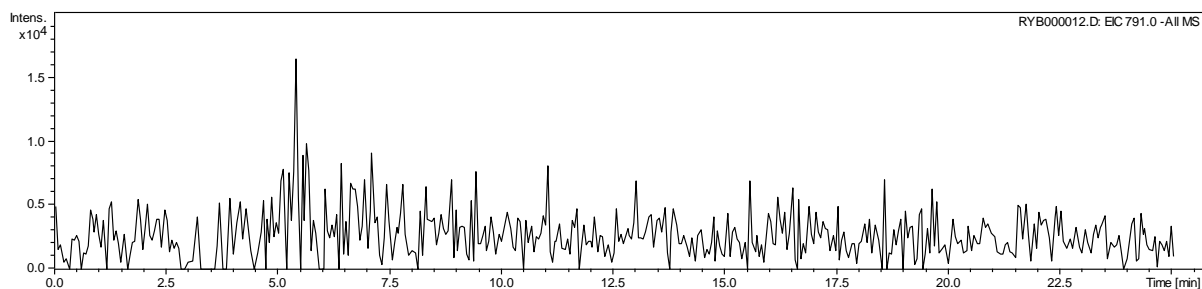

**Figure S46** EIC at  $m/z$  791.0 ( $C_{30}H_{48}O_{24}$ ) for caramelised rybose in the negative ion mode

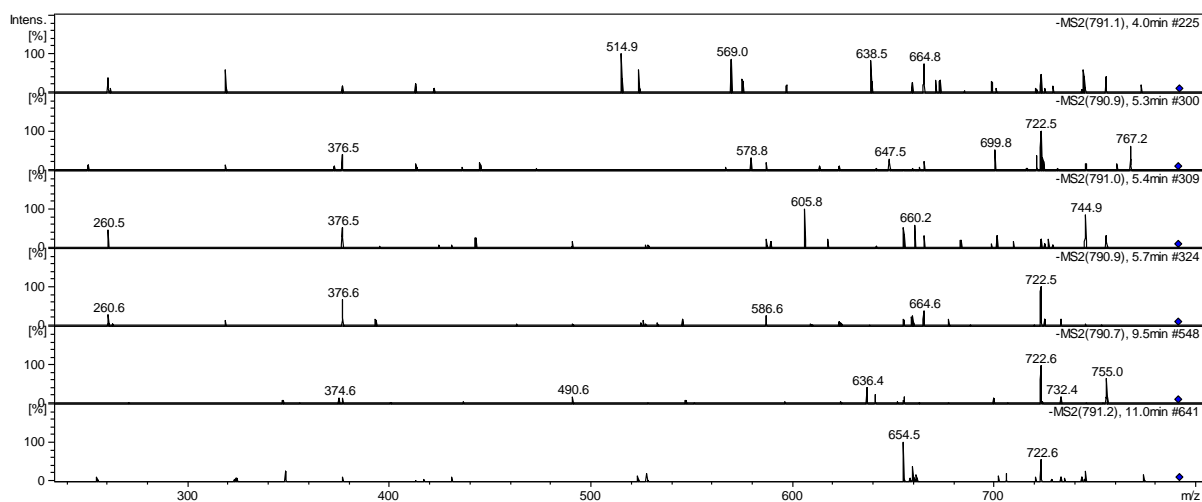

**Figure S47** MS<sup>2</sup> spectra of fragment at  $m/z$  791.0 ( $C_{30}H_{48}O_{24}$ ) for six chromatographic peaks of caramelised rybose in the negative ion mode

**Table S2** Negative ion mode ESI-MS/MS data for caramelised fructose

|              | <b>MS<sup>2</sup></b>                                                                                                                                                                                                                                                      | <b>MS<sup>3</sup></b>                                                                                                                                                                                                                                                         | <b>MS<sup>4</sup></b>                                      |
|--------------|----------------------------------------------------------------------------------------------------------------------------------------------------------------------------------------------------------------------------------------------------------------------------|-------------------------------------------------------------------------------------------------------------------------------------------------------------------------------------------------------------------------------------------------------------------------------|------------------------------------------------------------|
| <i>m/z</i>   | <i>m/z (Intensity)</i>                                                                                                                                                                                                                                                     | <i>m/z (Intensity)</i>                                                                                                                                                                                                                                                        | <i>m/z (Intensity)</i>                                     |
| <b>160.8</b> | 113.1 (100.0); 101.2 (77.7); 131.0 (31.8); 71.6 (16.0); 83.4 (13.5)                                                                                                                                                                                                        |                                                                                                                                                                                                                                                                               |                                                            |
| <b>178.9</b> | 89.3 (100.0); 160.9 (98.5); 143.0 (85.2); 119.1 (67.6); 113.1 (34.8); 131.1 (30.5); 101.2 (24.9); 71.6 (17.4); 148.9 (16.9); 107.1 (13.4); 87.3 (13.0); 59.8 (10.1); 125.0 (9.0); 178.9 (3.4); 99.2 (2.2)                                                                  | <b>142.9:</b> 125.0 (100.0); 87.3 (67.4); 115.1 (56.5)<br><b>89.2:</b> 71.6 (100.0); 59.8 (70.74)<br><b>119.0:</b> 101.2 (100.0); 89.3 (10.5)<br><b>131.0:</b> 113.1 (100.0); 101.2 (91.2)                                                                                    |                                                            |
|              |                                                                                                                                                                                                                                                                            | <b>160.8:</b> 113.1 (100.0); 131.0 (47.4); 142.9 (32.8); 101.1 (14.3)                                                                                                                                                                                                         | <b>113.0:</b> 95.2 (100) 85.4 (47.25)                      |
| <b>283.1</b> | 264.9 (100.0); 217.9 (26.2); 114.1 (20.7); 283.1 (19.7); 246.8 (15.2); 221.9 (10.3); 186.9 (9.8); 220.8 (9.0)                                                                                                                                                              | <b>264.8:</b> 246.8 (100.0); 217.9 (57.01)                                                                                                                                                                                                                                    |                                                            |
| <b>322.9</b> | 160.9 (100.0); 232.9 (80.4); 113.1 (22.4); 322.9 (21.2); 143.0 (15.2); 178.8 (12.5); 202.9 (8.9); 274.9 (6.7); 101.2 (6.2); 304.9 (4.1); 131.0 (3.9); 250.9 (3.8); 220.9 (2.7); 119.1 (2.4); 292.9 (2.2); 125.1 (2.2)                                                      | <b>232.9:</b> 160.9 (100.0); 113.1 (67.6); 142.9 (65.2)                                                                                                                                                                                                                       |                                                            |
| <b>341.0</b> | 178.9 (100.0); 322.9 (90.6); 160.9 (34.5); 220.9 (18.1); 341.0 (14.9)                                                                                                                                                                                                      | <b>160.9:</b> 113.1 (100.0); 101.2 (50.4); 142.9 (47.7); 160.9 (25.3); 89.3 (22.1); 85.4 (16.5)<br><b>178.8:</b> 160.9 (100.0); 89.3 (88.6)<br><b>160.9:</b> 101.1 (100.0)                                                                                                    |                                                            |
| <b>367.0</b> | 276.9 (100.0); 186.9 (47.0); 348.9 (47.7); 204.9 (40.1); 367.0 (17.2); 168.9 (13.8); 330.9 (12.4); 127.0 (7.5); 156.9 (6.1); 306.9 (5.6); 192.9 (4.2); 190.9 (3.2); 336.9 (3.7); 178.9 (2.6); 172.9 (2.2); 113.1 (1.9); 125.1 (1.6); 258.8 (1.4); 312.9 (1.9); 216.8 (1.0) | <b>276.8:</b> 186.9 (100.0); 204.9 (93.9); 168.9 (38.6); 156.9 (14.6); 216.9 (6.9)<br><b>186.9:</b> 127.0 (100.0)<br><b>348.9:</b> 330.9 (100.0); 186.9 (78.3); 204.9 (73.2); 276.9 (26.6); 258.9 (33.6); 168.9 (40)<br><b>204.8:</b> 186.9 (98.7); 168.9 (100); 156.9 (44.4) | <b>186.9:</b> 115.1 (100.0)<br><b>204.9:</b> 168.9 (100.0) |
| <b>413.2</b> | 344.9 (100.0); 252.9 (48.1); 322.9 (40.0)                                                                                                                                                                                                                                  |                                                                                                                                                                                                                                                                               |                                                            |
| <b>485.2</b> | 322.9 (100.0); 160.9 (19.3); 178.9 (9.2); 232.9 (7.9); 485.2 (7.2); 395.0 (5.6); 143.0 (3.9); 304.9 (3.7); 467.0 (2.7); 383.0 (2.6); 340.9 (1.4); 425.0 (1.1); 449.0 (1.1); 214.9 (1.0); 286.9 (0.9)                                                                       | <b>322.9:</b> 160.9 (100.0); 232.9 (87.2); 113.1 (27.0); 143.0 (13.9); 178.9 (10.3)                                                                                                                                                                                           |                                                            |
| <b>503.2</b> | 340.9 (100.0); 485.0 (58.3); 413.0 (53.7); 178.9 (50.0); 322.9 (50.0); 383.0 (43.8); 160.9 (13.8); 250.8 (7.5); 443.0 (6.8); 220.8 (6.4)                                                                                                                                   | <b>341:</b> 178.9 (100.0)                                                                                                                                                                                                                                                     |                                                            |
| <b>529.2</b> | 511.1 (100.0); 349.0 (60.1); 439.0 (33.6); 367.0 (20.2); 529.2 (17.0); 276.9 (16.6); 186.9 (12.8); 204.9 (11.4); 330.9 (4.9); 168.9 (3.7); 258.9 (3.3); 493.1 (3.2); 469.1 (2.2); 246.9                                                                                    | <b>511.1:</b> 348.9 (100.0); 439.0 (42.5); 168.8 (28.4); 276.9 (22.1); 258.9 (21.4); 168.9 (17.5)                                                                                                                                                                             |                                                            |



|              |                                                                                                                                                                                                                   |                                                                        |                            |
|--------------|-------------------------------------------------------------------------------------------------------------------------------------------------------------------------------------------------------------------|------------------------------------------------------------------------|----------------------------|
|              | (2.0); 481.1 (2.0)                                                                                                                                                                                                | <b>439.0:</b> 349.0(100.0)<br><b>349.0:</b> 186.8 (42.2); 258.9 (41.2) |                            |
| <b>647.2</b> | 485.01 (100.0); 323.0 (34.4); 467.1 (3.6); 566.1 (2.4); 232.9 (1.7); 323.9 (1.4); 304.9 (1.3); 341.0 (1.1); 629.2 (0.9); 395.0 (0.8); 178.9 (0.6)                                                                 | <b>485.1:</b> 322.9 (100.0); 232.9 (9.0)                               | <b>322.9:</b> 232.8 (67.3) |
| <b>665.3</b> | 485.1 (100.0); 503.0 (87.0); 340.9 (70.9); 545.1 (52.3); 575.2 (49.2); 322.9 (38.9); 647.2 (36.3); 383.0 (34.5); 413.0 (26.9)                                                                                     |                                                                        |                            |
| <b>683.2</b> | 647.2 (100.0); 485.1 (33.1); 503.0 (0.5)                                                                                                                                                                          | <b>647.2:</b> 485.1 (100.0)                                            |                            |
| <b>691.2</b> | 511.1 (100.0); 673.2 (38.0); 348.9 (32.6); 439.0 (20.3); 529.1 (13.8); 601.2 (12.8); 691.2 (9.1); 367.0 (8.2)                                                                                                     |                                                                        |                            |
| <b>989.3</b> | 647.2 (100.0); 899.3 (55.6); 827.3 (47.8); 869.3 (42.3); 665.2 (42.2); 545.2 (38.7); 485.1 (29.0); 503.1 (21.0); 707.3 (20.2); 340.9 (18.6); 383.1 (17.4); 809.2 (16.6); 737.3 (16.1); 971.3 (16.0); 322.9 (11.2) |                                                                        |                            |

**Table S3** Negative ion mode ESI-MS/MS data for caramelised galactose

| <i>m/z</i>   | <b>MS<sup>2</sup></b>                                                                                                                                                                                                                                                                                                                                          | <b>MS<sup>3</sup></b>                                                                                                                                             |
|--------------|----------------------------------------------------------------------------------------------------------------------------------------------------------------------------------------------------------------------------------------------------------------------------------------------------------------------------------------------------------------|-------------------------------------------------------------------------------------------------------------------------------------------------------------------|
|              | <i>m/z (Intensity)</i>                                                                                                                                                                                                                                                                                                                                         | <i>m/z (Intensity)</i>                                                                                                                                            |
| <b>160.9</b> | 113.1(100) 101.1 0(90.7) 131.0(47.8) 142.9(33.0) 89.2(13.9) 87.3(12.9)                                                                                                                                                                                                                                                                                         |                                                                                                                                                                   |
| <b>178.8</b> | 160.9(100) 89.3(61.5) 142.9(43.9) 119.0(35.7) 113.1(25.2) 131.0 (21.6) 101.2(21.6) 148.9(8.5) 87.3(7.6) 107.1(7.3)<br>125.0(6.2) 59.8(5.7) 71.5(5.5)                                                                                                                                                                                                           | <b>160.9:</b> 113.1 (100) 131.0 (68.82) 142.9(31.59)                                                                                                              |
| <b>220.9</b> | 160.9(100)                                                                                                                                                                                                                                                                                                                                                     |                                                                                                                                                                   |
| <b>255.0</b> | 236.9(100) 224.9(63.9) 75.4(60.8) 178.9(59.5)                                                                                                                                                                                                                                                                                                                  |                                                                                                                                                                   |
| <b>323.0</b> | 160.9(100) 113.1(34.9) 220.9(27.0) 232.8(26.8) 304.9(17.6) 178.9(17.2) 262.9(16.6) 142.9(15.2) 244.8 (6.4) 250.8 (6.0)                                                                                                                                                                                                                                         | <b>161.0:</b> 113.1(100)                                                                                                                                          |
| <b>341.0</b> | 178.9(100) 322.9(69.3) 160.9(40.02) 250.9(30.2) 220.9(27.2) 142.9(22.4) 113.1(20.3) 119.0(14) 101.2 (13.3) 266.9<br>(11.2) 280.9(11.1) 125.0(8.5) 131.0(8.2) 311.0(7.8)                                                                                                                                                                                        | <b>179.0:</b> 89.3(100)                                                                                                                                           |
| <b>449.0</b> | 286.9(100) 431.0(65.8) 160.9(47.3) 322.9(33)                                                                                                                                                                                                                                                                                                                   |                                                                                                                                                                   |
| <b>485.2</b> | 322.9(100) 160.9(15.6) 178.9(6.4) 304.9(4.6) 467.1(4.2) 220.9(4.1) 383.0(3.2) 425.0 (3.0) 340.9(2.9) 449.1(2.8)<br>395.0 (2.5) 142.9(2.2) 364.9(2.0) 232.9(1.8) 262.9(1.8)                                                                                                                                                                                     | <b>323.0:</b> 160.9(100) 113.1(40.5) 232.9 (32.8)                                                                                                                 |
| <b>503.0</b> | 340.9(100) 322.9(45) 383.0(29.5) 485.1(28) 178.9(27.2) 443.0(14.5) 220.9(13.2) 250.9(11.9) 413.0(11.9) 160.9(9.0)<br>280.9(6.6) 304.9 (6.0) 262.8(4.1)                                                                                                                                                                                                         | <b>340.9:</b> 78.9(100)<br><b>383.0:</b> 220.9(100)                                                                                                               |
| <b>519.0</b> | 483.1(100)                                                                                                                                                                                                                                                                                                                                                     |                                                                                                                                                                   |
| <b>611.2</b> | 449.0(100) 431.0(18) 593.1 (17.9) 322.9(17.2) 286.9(15.5) 485.0 (8.8) 220.9(5.6) 521.1(4.3) 178.9(4.0)                                                                                                                                                                                                                                                         |                                                                                                                                                                   |
| <b>647.2</b> | 485.1(100) 323.0(32.4) 467.1(23) 566.2(4.6) 629.2(4.4) 304.9(3.3) 383.0(2.8) 341.0(2.8) 503.1(2.3) 220.9(2.1)<br>527.1(1.8) 611.2(1.6) 557.2(1.6) 365.0 (1.5) 587.2(1.4) 425.1(1.3) 545.2(1.3) 449.1(0.5) 262.9(0.5) 395.0(0.5)<br>250.9(1.1) 615.2(0.9) 244.9(0.8) 407.0(0.8) 232.9(0.7) 286.9(0.7) 393.0(0.7) 638.2(0.7) 362.9(0.6) 575.2(0.5)<br>413.1(0.5) | <b>485.1:</b> 322.9(100) 160.9(7.4) 220.9 (7.0)<br>304.9 (5.1)                                                                                                    |
| <b>665.2</b> | 503.1(100) 485.1(53.5) 647.2(44.5) 322.9(27.1) 383.0(26.7) 341.0(15.9) 545.2 (15) 443.1 (10.2) 220.9(7.0)<br>413.1(5.9) 605.2(5.6) 575.2 (4.4) 262.9(3.8) 280.9(3.8) 395.0 (3.3) 467.1(2.9) 629.2(2.8) 178.9(2.7) 664.3(2.6)<br>304.9(2.3) 160.9 (2) 425.1(1.8) 563.1(1.3)                                                                                     | <b>503.1:</b> 340.9(100) 322.9(38.4) 383.0(29.0)<br>178.9(18.8)<br><b>485.1:</b> 341.0 (70.43) 322.9(100)<br><b>383.0:</b> 220.9(100)<br><b>545.2:</b> 383.0(100) |
| <b>683.2</b> | 647.2(100) 485.1(11.4) 665.2(10.9)                                                                                                                                                                                                                                                                                                                             | <b>647.2:</b> 485.1(100)                                                                                                                                          |
| <b>687.0</b> | 507.1(100) 525.1(68.5) 344.9(60.1) 363.0(52.1) 405.0 (46.2) 655.2 (41.1) 669.2 (28.4) 242.9(27.8) 567.1(26.1)<br>272.9(20)                                                                                                                                                                                                                                     | <b>525.1:</b> 344.9(100)                                                                                                                                          |
| <b>737.3</b> | 656.2(100) 575.2(83.0) 719.2(41.0) 596.2(22)                                                                                                                                                                                                                                                                                                                   |                                                                                                                                                                   |
| <b>773.3</b> | 611.2(100) 449.1(35.9) 593.2(25.6) 755.3(23.6) 323.0(11.6) 485.1(9.5) 431.0(8.3) 383.0(6.3) 491.1(6.0)                                                                                                                                                                                                                                                         | <b>611.2:</b> 449.1(100)                                                                                                                                          |
| <b>791.3</b> | 629.3(100) 647.2(58.9) 773.3(4102) 467.1(30.7) 611.2 (26.8) 755.2(26.8) 322.9(25)                                                                                                                                                                                                                                                                              |                                                                                                                                                                   |

|              |                                                                                                                                                                                              |                                                                              |
|--------------|----------------------------------------------------------------------------------------------------------------------------------------------------------------------------------------------|------------------------------------------------------------------------------|
| <b>809.3</b> | 647.3(100) 485.1(33.6) 629.2(23.3) 467.1(9.4) 323.0(8.9) 791.3(3.8) 728.3 (3.7) 383.0(3.5) 503.2(2.7) 665.2(2.6)<br>545.2(2.5) 527.2(2.5) 689.3(2.4) 304.9(1.7) 341.0(1.4) 707.2 (1.3)       | <b>647.3:</b> 485.1(100) 467.1(22.6) 323.0(23.6)<br><b>485.1:</b> 322.9(100) |
| <b>827.3</b> | 665.2(100) 647.2(40.1) 485.1(39.9) 503.1(39.3) 809.3(32.3) 340.9 (16.3) 383.0(16.1) 545.1(15.6) 707.3(120.6)<br>322.9(9.2) 767.2(5.9) 737.2(5.5) 443.1(4.3) 831.2(3.4) 262.8(3.3) 467.0(3.1) |                                                                              |
| <b>972.3</b> | 810.3(100) 648.2(25.82)                                                                                                                                                                      |                                                                              |
| <b>989.3</b> | 827.3(100) 665.3(62.8) 809.3(47.5) 647.2(40.7) 503.1(21) 545.2(20.9) 971.3(18.5) 383.0(17.1) 485.0(16.8)                                                                                     |                                                                              |

**Table S4** Negative ion mode ESI-MS/MS data for caramelised mannose

|              | <b>MS<sup>2</sup></b>                                                                                                                                                                                         | <b>MS<sup>3</sup></b>                                                              | <b>MS<sup>4</sup></b>     |
|--------------|---------------------------------------------------------------------------------------------------------------------------------------------------------------------------------------------------------------|------------------------------------------------------------------------------------|---------------------------|
| <i>m/z</i>   | <i>m/z (Intensity)</i>                                                                                                                                                                                        | <i>m/z (Intensity)</i>                                                             | <i>m/z (Intensity)</i>    |
| <b>161.0</b> | 101.1(100) 113.1(86.9) 85.3(68.0)                                                                                                                                                                             |                                                                                    |                           |
| <b>178.9</b> | 160.9(100) 135.0 (85.4) 119.0 (79.1) 89.3(78.2) 150.9(71.8) 122.0(69.4)                                                                                                                                       |                                                                                    |                           |
| <b>253.2</b> | 114.1(100) 191.9(78.2) 113.1 (61.8)                                                                                                                                                                           |                                                                                    |                           |
| <b>255.0</b> | 113.1(100)                                                                                                                                                                                                    |                                                                                    |                           |
| <b>279.9</b> | 114.1(100) 113.1(58.6) 219.9(8.2) 221.9(5.7) 218.9(4.5) 262.9(3.7) 251.9(3.6) 178.8(3.3)<br>165.9(2.5)                                                                                                        |                                                                                    |                           |
| <b>283.1</b> | 114.1(100) 217.9(69.7) 264.9(66.9) 221.8(38.9) 255.9(20.9)                                                                                                                                                    |                                                                                    |                           |
| <b>322.9</b> | 160.9(100) 114.1(41.4) 220.9(38.3) 276.0(15.0) 113.1(12.2) 304.9(10.8) 232.9(9.1)                                                                                                                             |                                                                                    |                           |
| <b>341.0</b> | 322.9(100) 114.1(96.9) 279.9(82.9) 276.0(75.3) 178.9(35.9) 264.9(13.3) 294.0(11.7) 341.0 (11.0)<br>280.9 (10.2) 160.9(9.0) 220.9 (5.9) 119.1(4.7) 217.9(4.6) 113.1 (3.9) 250.9 (3.1) 221.9(2.8)<br>282.9(2.6) | <b>323.0:</b> 275.9(85.05) 114.1 (100)<br>217.9(16.7)<br><b>275.9:</b> 232.9 217.9 | <b>276.0:</b><br>133(100) |
| <b>485.1</b> | 322.9(100) 178.9(9.7) 220.9 (9.3) 160.9(8.5) 341.0(7.4) 467.1(7.0) 425.0(4.8) 304.9(4.5)<br>340.9(100) 443.1(73.6) 383.0(42.0) 485.1(40.1) 322.9(38.1) 178.9(36.9) 413.0(18.5) 220.9(12.3)                    | <b>323.0:</b> 160.9(100)                                                           |                           |
| <b>503.1</b> | 160.9(9.3) 280.9(8.1) 425.0(7.5) 304.9(7.2) 262.9(5.2) 250.9(4.7)                                                                                                                                             | <b>341.0:</b> 178.9 (100)                                                          |                           |
| <b>647.2</b> | 485.1(100) 322.9(21.0) 467.1 (15.7) 629.2 (10.0) 425.0(7.4)                                                                                                                                                   | <b>485.1:</b> 322.9(100)                                                           |                           |
| <b>665.2</b> | 503.1(100) 647.2(45.5) 341.0(43.8) 485.1(41.8) 605.2(38.4) 545.1(35.1) 383.0(32.7) 443.1(23.9)<br>323.0(19.1) 575.2(15.6) 587.2(10.0) 413.0(9.9) 467.1(4.3) 280.9(4.0) 220.9(3.8) 304.9(3.1)                  |                                                                                    |                           |
| <b>691.2</b> | 673.2(100) 511.1(7.32) 348.9(3.43)                                                                                                                                                                            | <b>673.2:</b> 511.1(100) 613.2(65.43)<br>655.2(32.4) 493.1(31.79)                  |                           |

|               |                                                                                                                                                                         |  |  |
|---------------|-------------------------------------------------------------------------------------------------------------------------------------------------------------------------|--|--|
| <b>809.3</b>  | 647.2(100) 629.2(27.7) 485.1(38.7) 791.3(13.4)                                                                                                                          |  |  |
| <b>827.3</b>  | 665.2(100) 503.1(61.1) 647.2(37.0) 545.1(29.2) 707.2(27.4) 485.1(25.6) 809.3(22.8) 605.2(18.6)<br>383.0(15.2) 767.3(14.8) 341.0(12.2) 737.2(12.2) 443.1(11.4) 575.2(10) |  |  |
| <b>835.4</b>  | 673.2(100) 775.3(83.5) 817.3(57.8) 511.1(43.1) 715.3(43.1) 493.1 (37.8) 745.3(35) 665.2(34.8)<br>451.1(21.3) 613.2(20.8) 553.1(16.2)                                    |  |  |
| <b>989.4</b>  | 827.3(100) 665.2(65.0) 503.1(37.3) 809.2(35.6) 647.2(34.0) 929.2(25.8) 707.2(22.7) 869.3(22.3)<br>485.0(20.4) 971.2 (20)                                                |  |  |
| <b>1151.4</b> | 989.3(100) 827.3(62.21)                                                                                                                                                 |  |  |
| <b>1313.4</b> | 1151.3(100)                                                                                                                                                             |  |  |
| <b>1321.4</b> | 1159.3(100) 1261.4(54.96) 1303.4(59.80) 1201.3(33.08) 1141.4(42.75) 997.3(50.64) 835.3(38.93)<br>673.2(25.7)                                                            |  |  |
